# Supplementary material for: A splice site variant in MADD affects hormone expression in pancreatic β cells and pituitary gonadotropes
Source: PubMed Central journal article supplement (PMC11141940; doi:10.1172/jci.insight.167598), 2024-05-22

**Full unedited gel for Figure 1D, RT-PCR with primers binding around *MADD* exon 30**

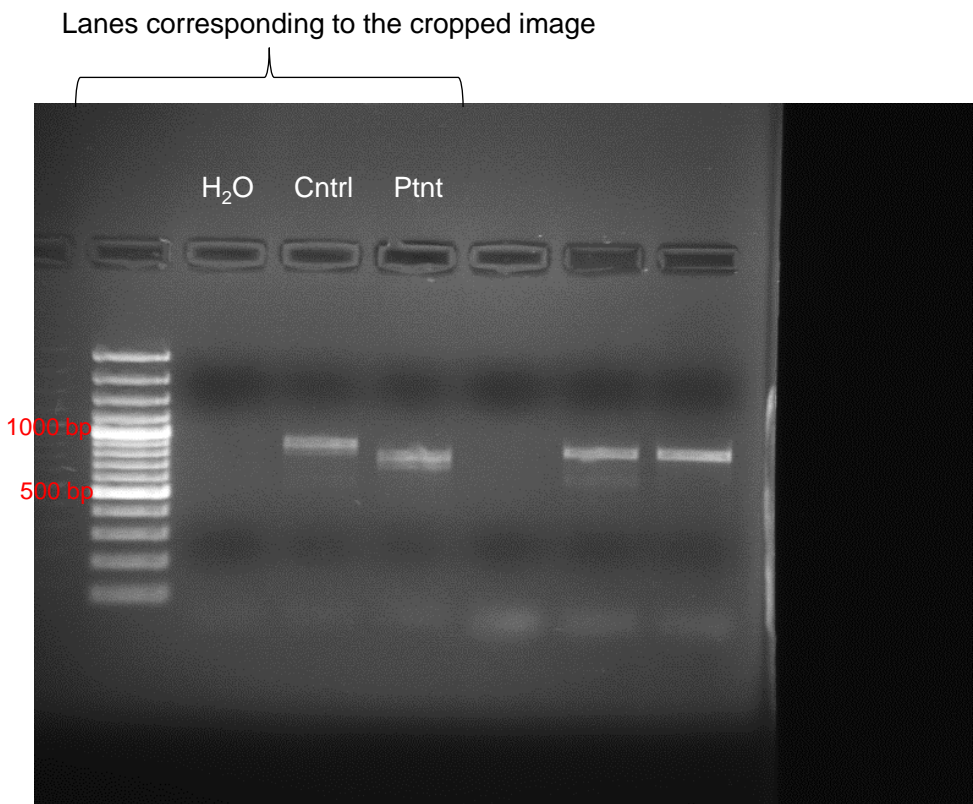

**Full unedited gel for Figure 2A, RT-PCR with primers specific to *MADD* and *GAPDH***

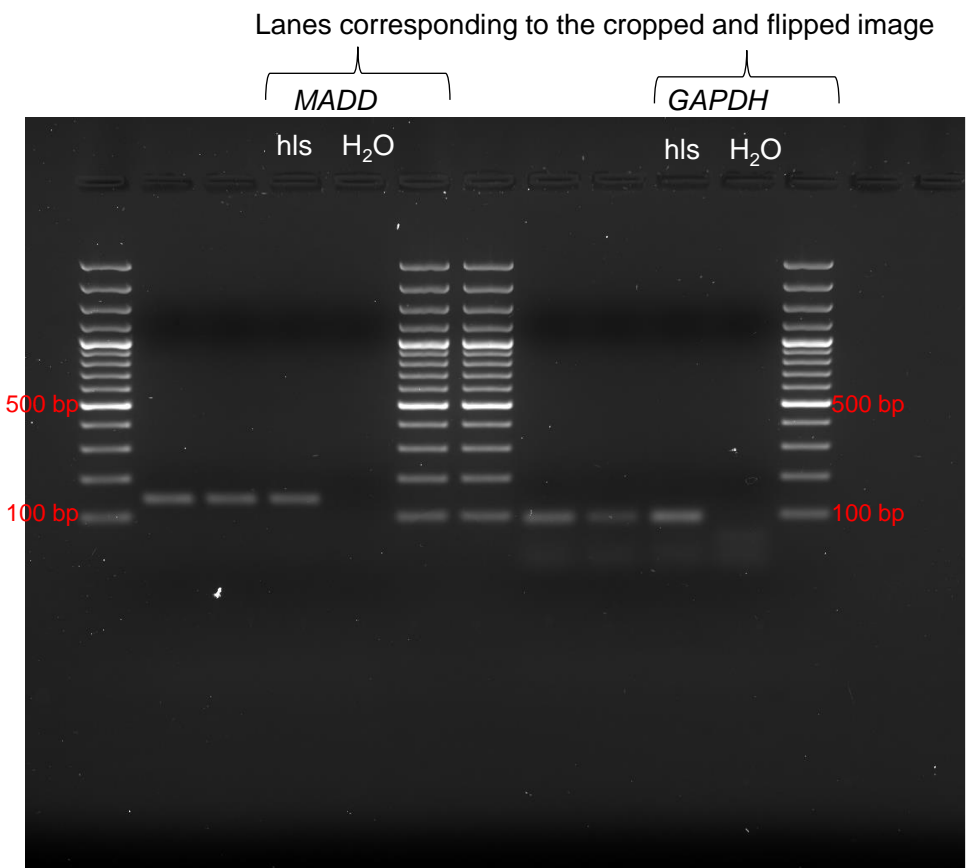

Lanes from the same gel were used for Figure S5A!

**Full unedited gel for Figure 2C, PCR with primers binding to genomic DNA around *MADD* exon 30**

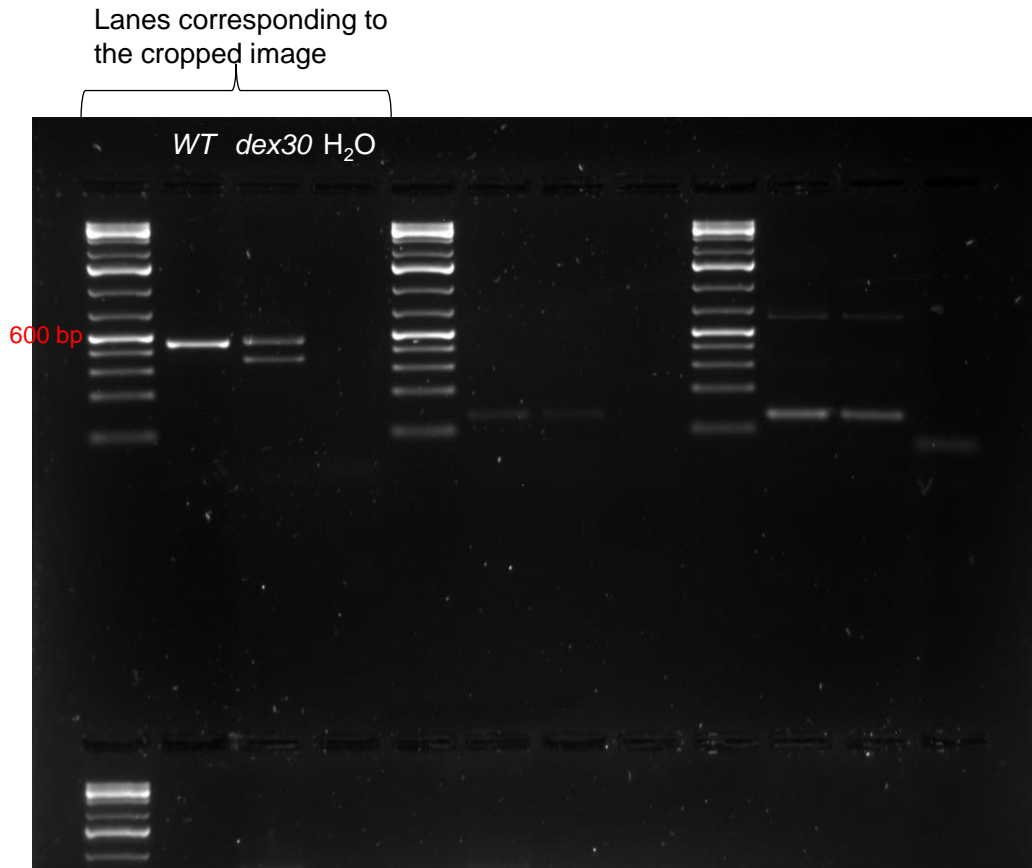

**Full unedited gel for Figure 5E, RT-PCR with primers binding around *Madd* exon 30**

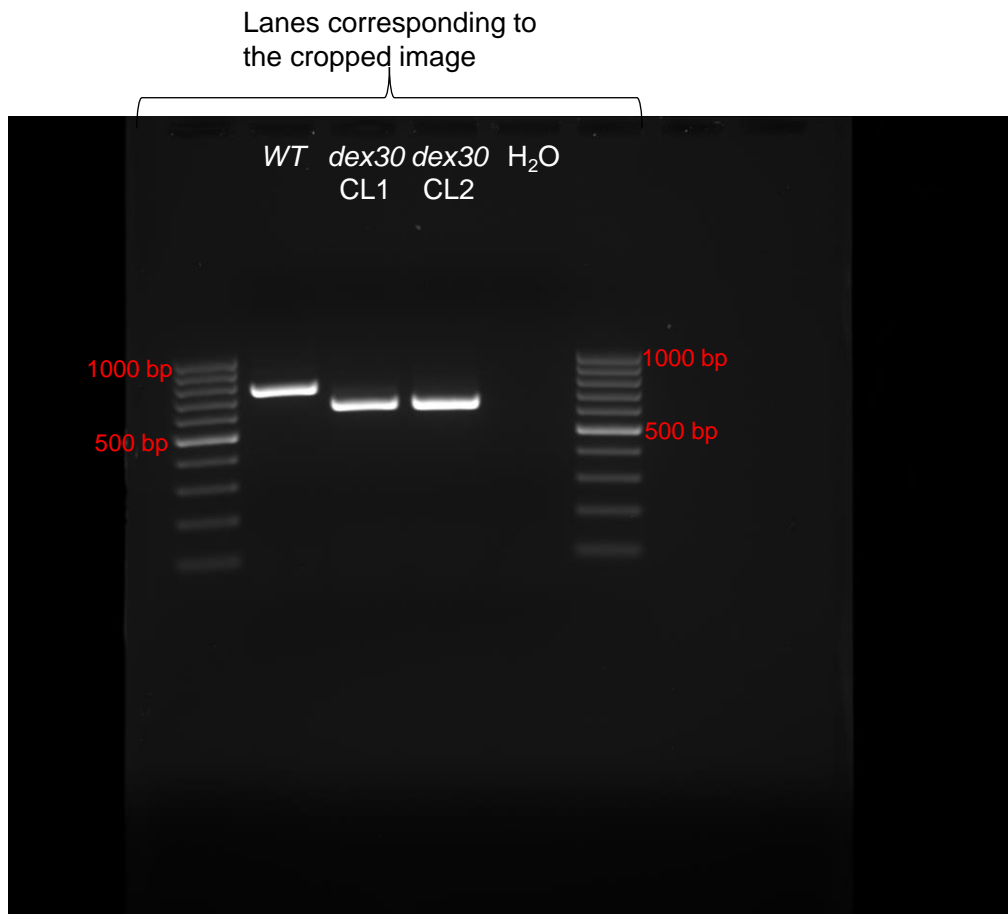

### Full unedited gel for Figure S1B, minigene assay PCR

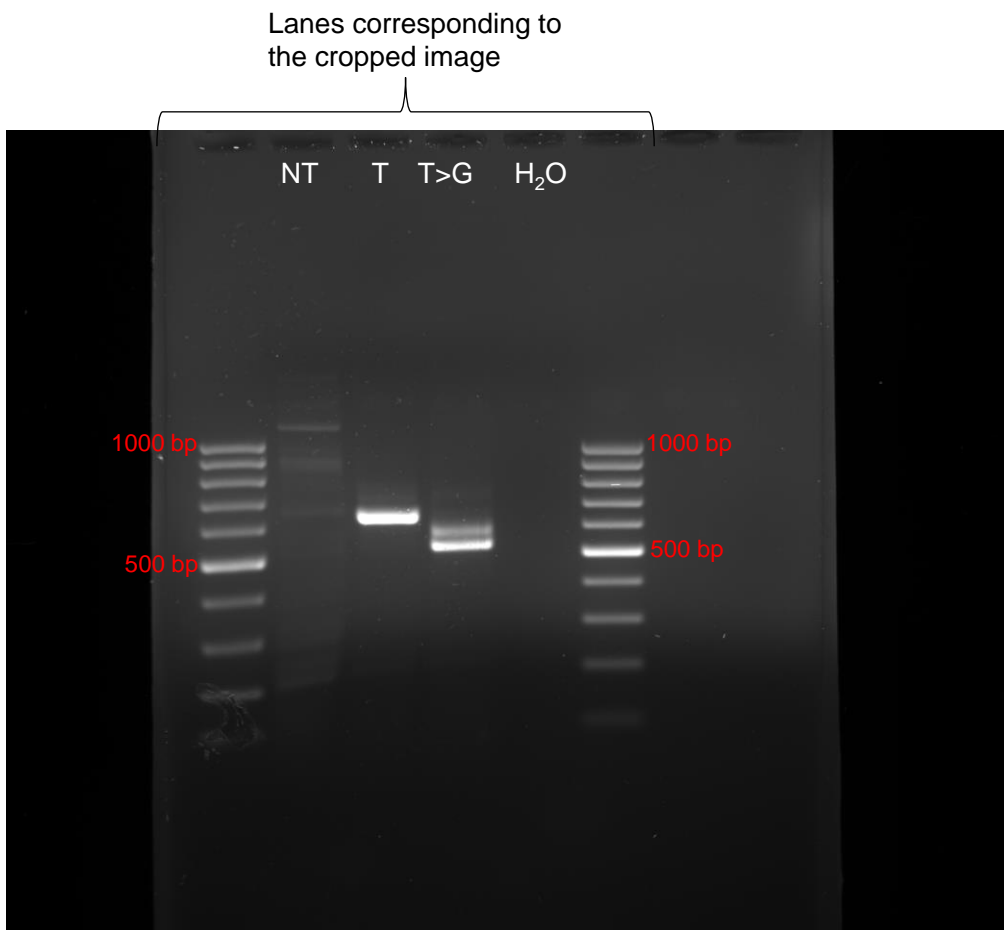

### Full unedited gel for Figure S4A, RT-PCR with primers binding around *MADD* exon 30 (see also next page (4))

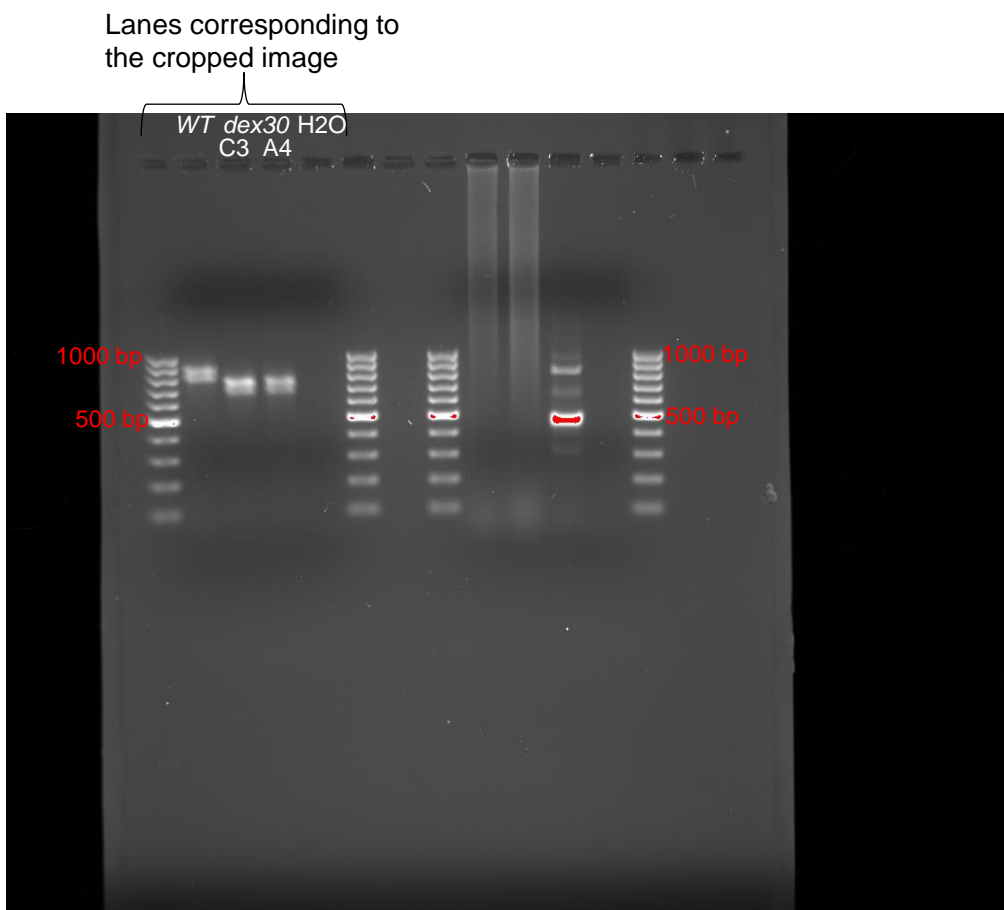

For the final Figure S4A the gel was run a little longer and this image with different frame was taken to improve resolution and focus.

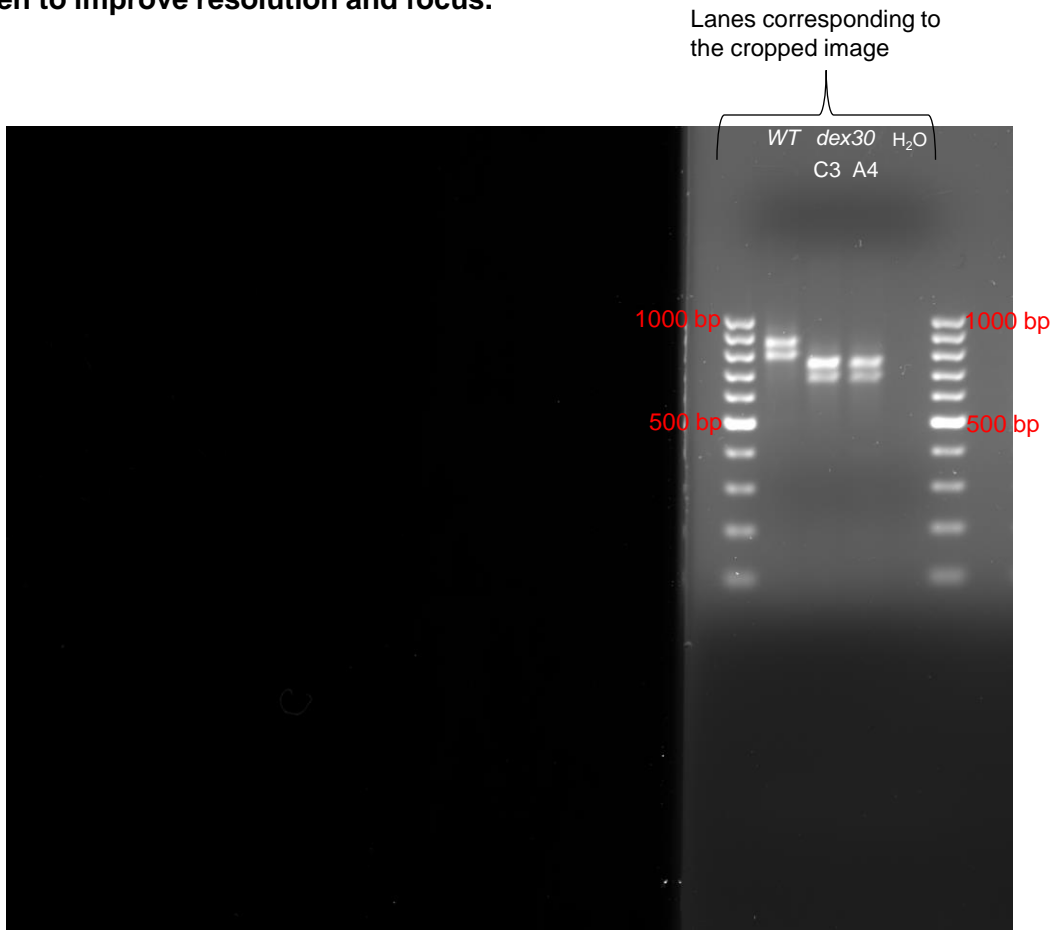

Full unedited gel for Figure S5A, RT-PCR with primers specific to *MADD* and *GAPDH*

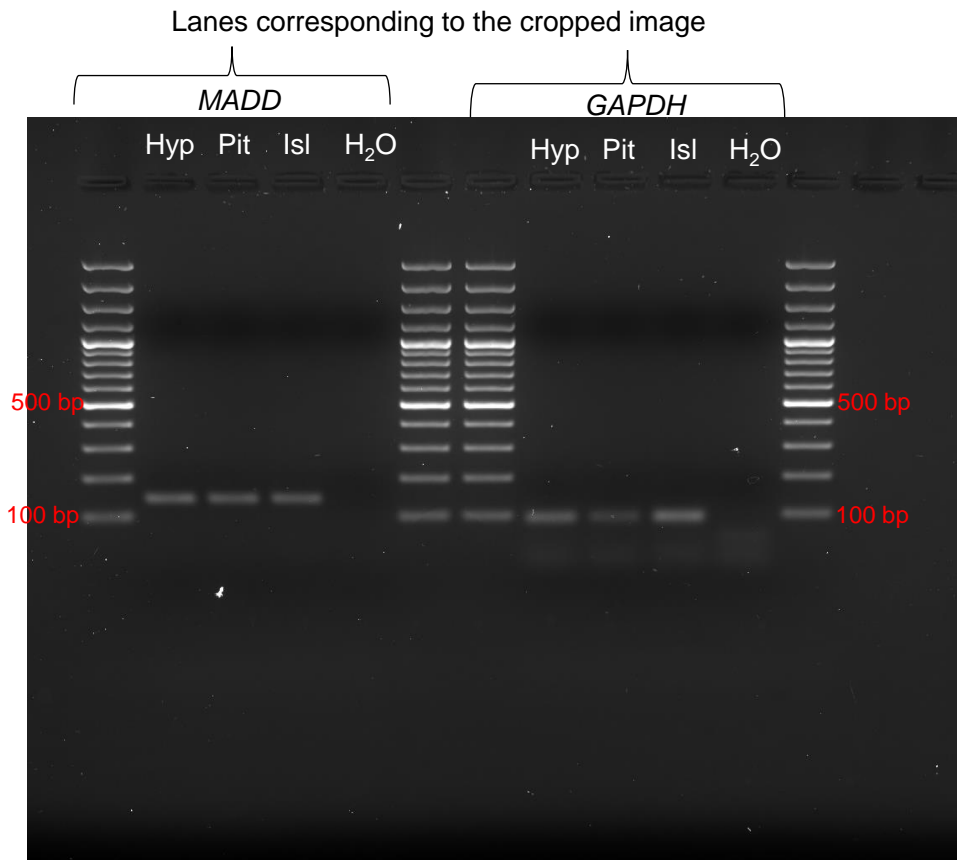

Lanes from the same gel were used for Figure 2A!

**Full unedited blot for Figure S6D, antibody against MADD**

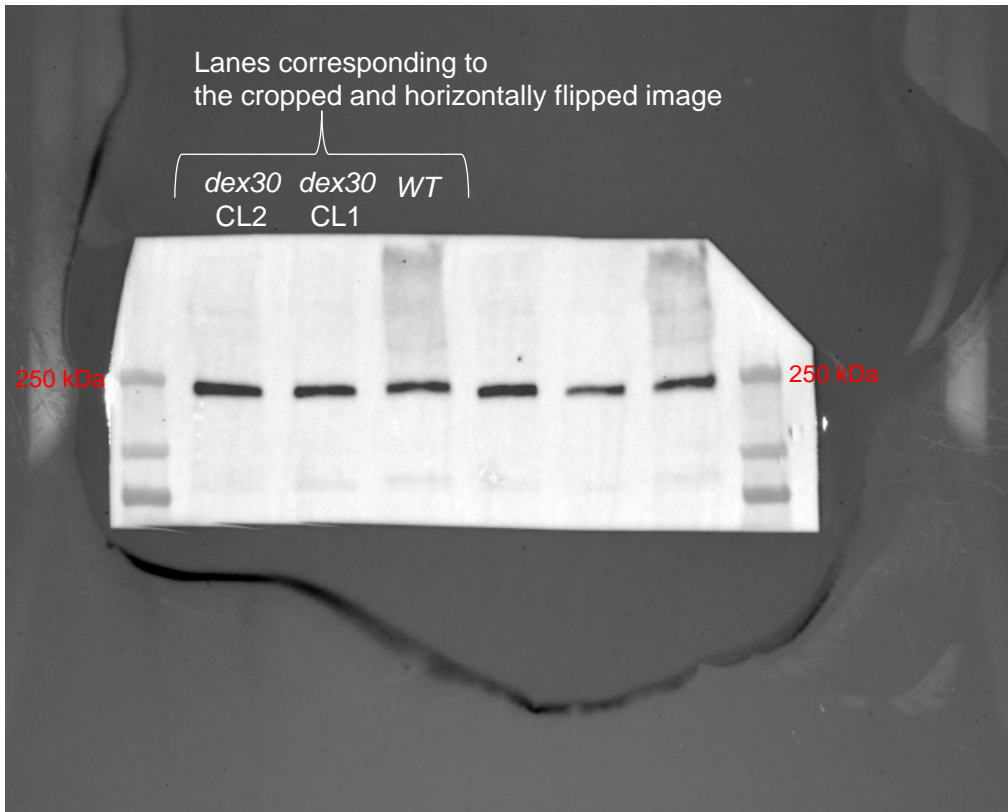

**Full unedited blot for Figure S6D, antibody against beta-Actin**

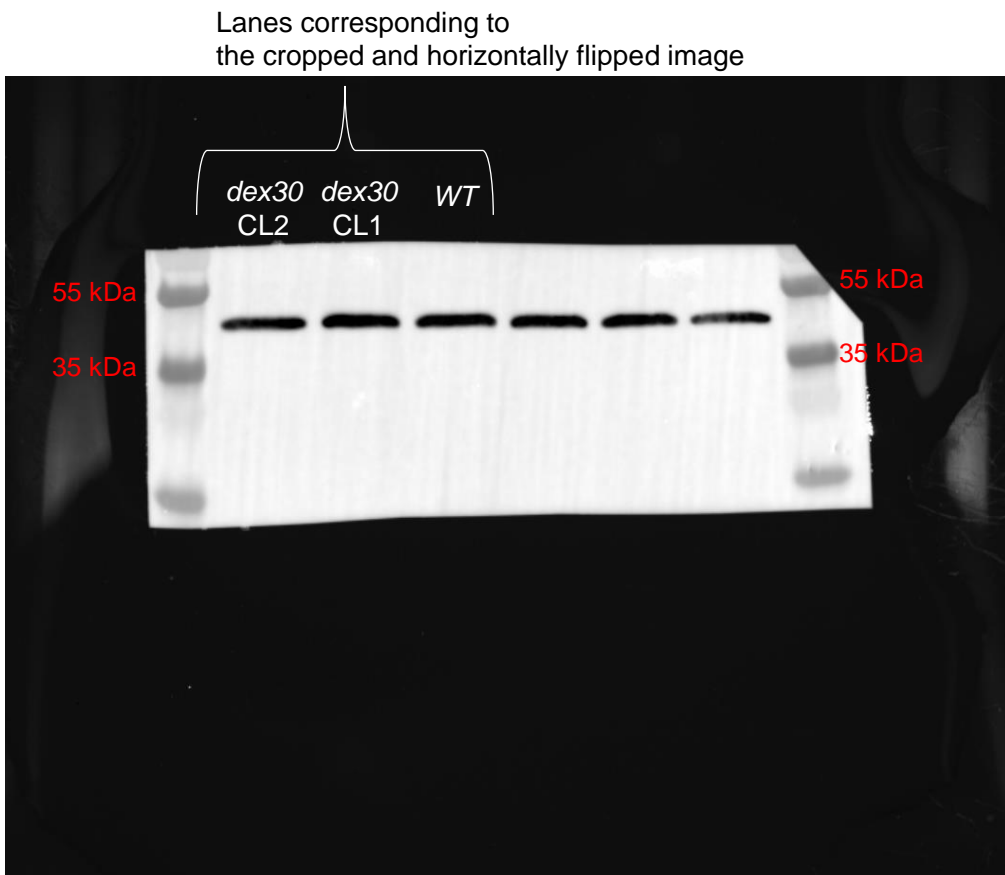

# Full unedited blot for Figure S6I, antibody against phospho-ERK1/2

Lanes corresponding to the cropped image

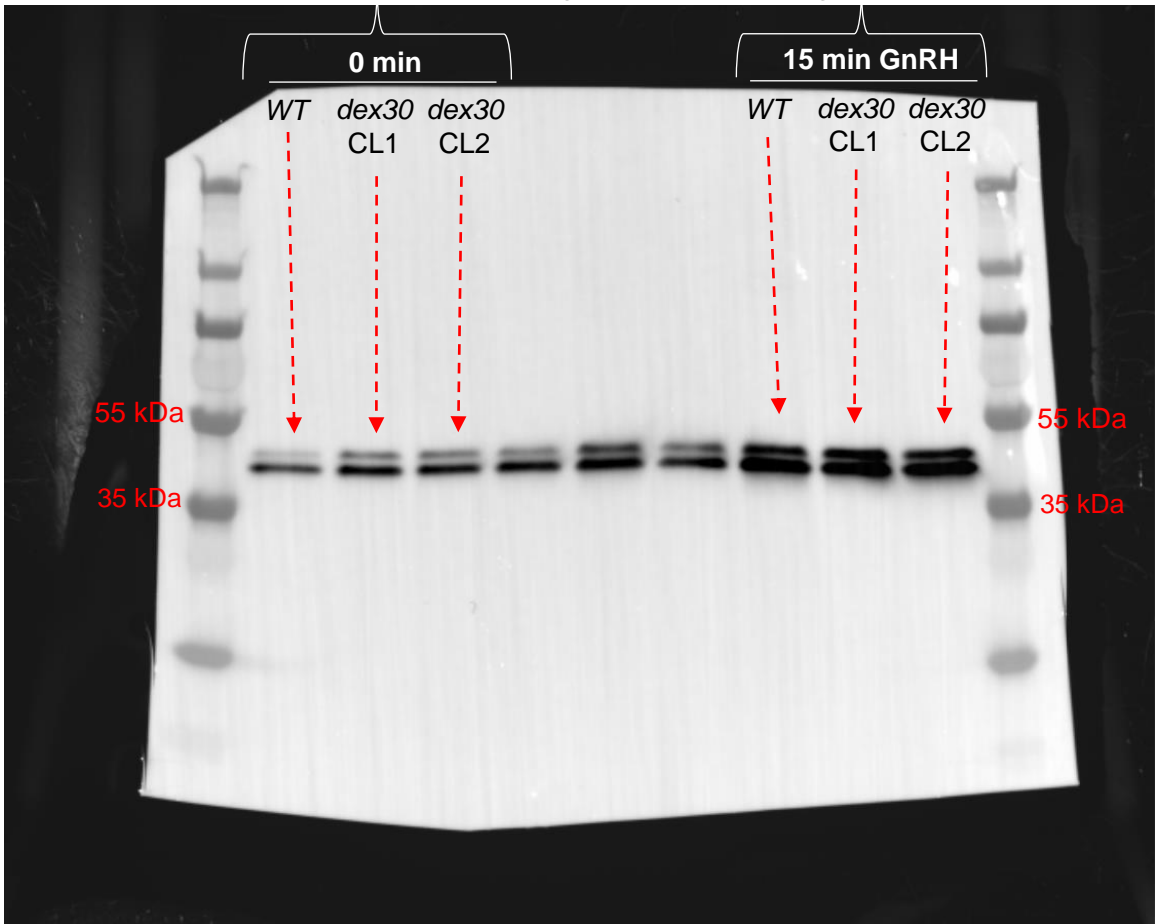

# Full unedited blot for Figure S6I, antibody against total-ERK1/2

Lanes corresponding to the cropped image

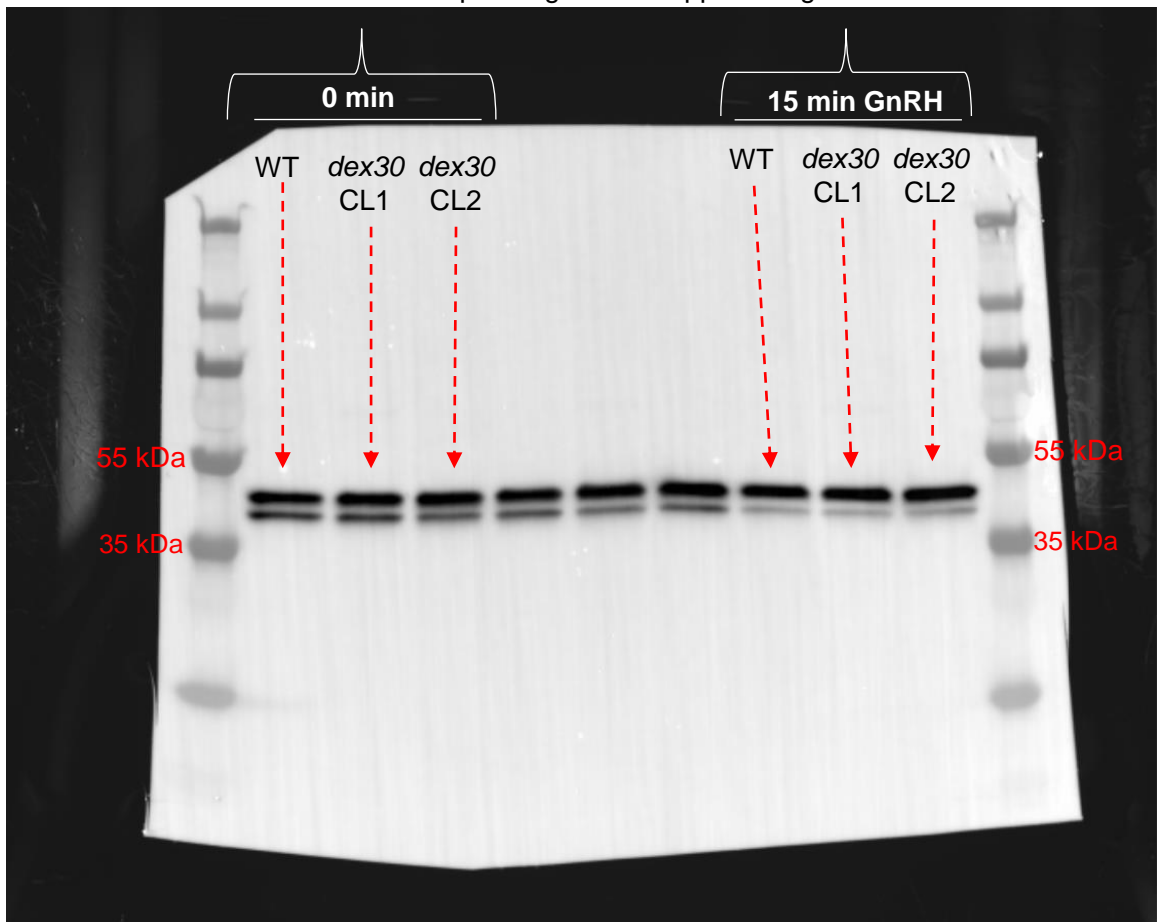

### Full unedited blot for Figure S7A, antibody against RAB3A-D

Lanes corresponding to the cropped image

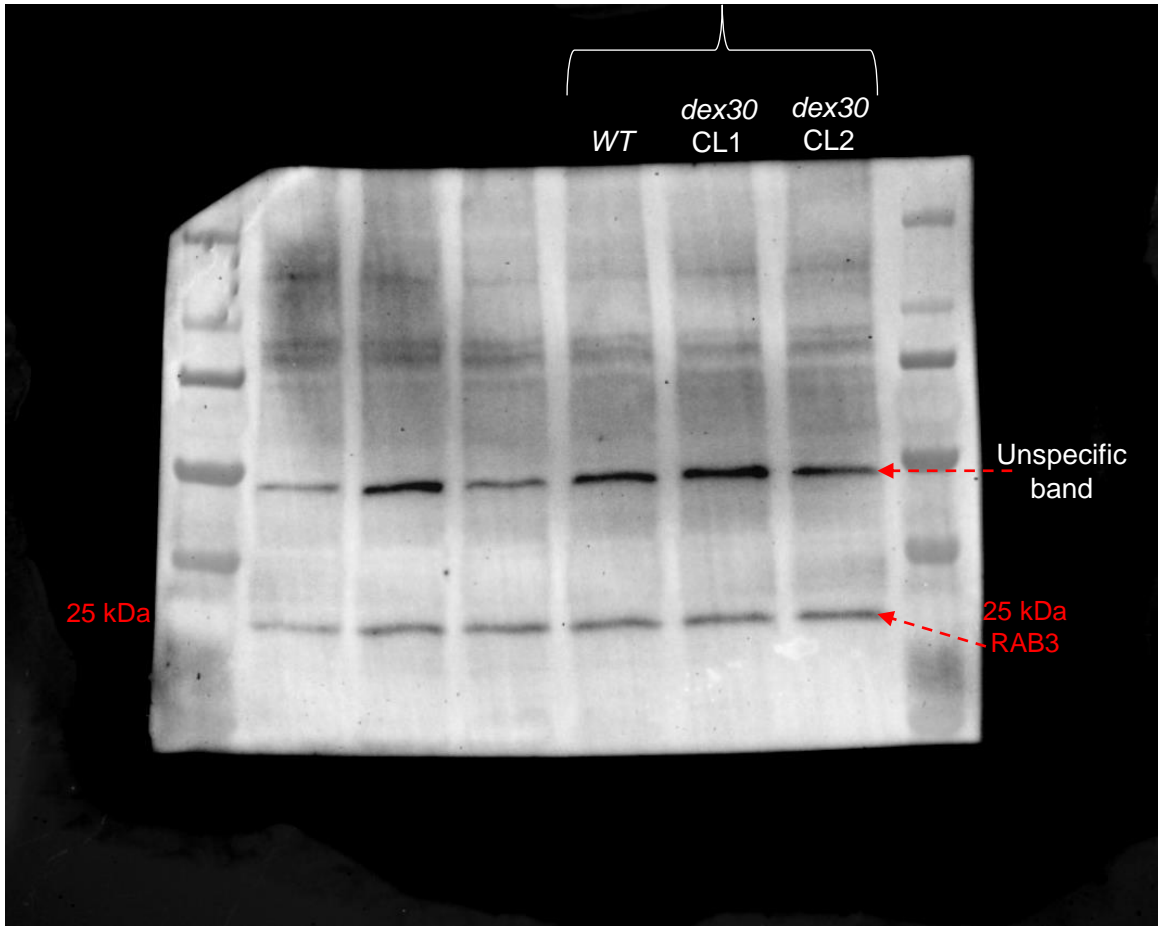

### Full unedited blot for Figure S7A, antibody against beta-Actin

Lanes corresponding to the cropped image

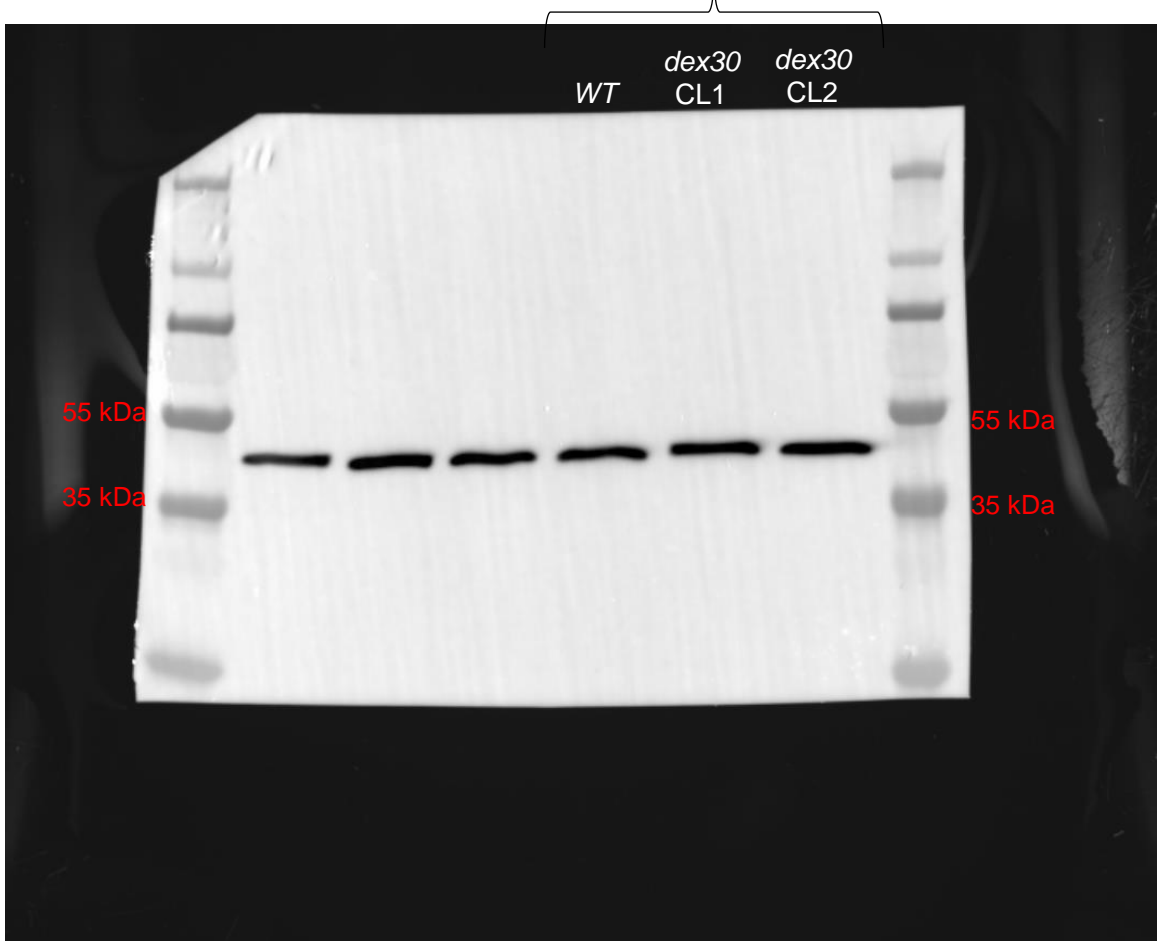

Full unedited gel for Figure S7C, RT-PCR with primers binding around *MADD* exon 30

Lanes corresponding to the cropped image

*dex30 dex30*  
H<sub>2</sub>O WT CL1 CL2

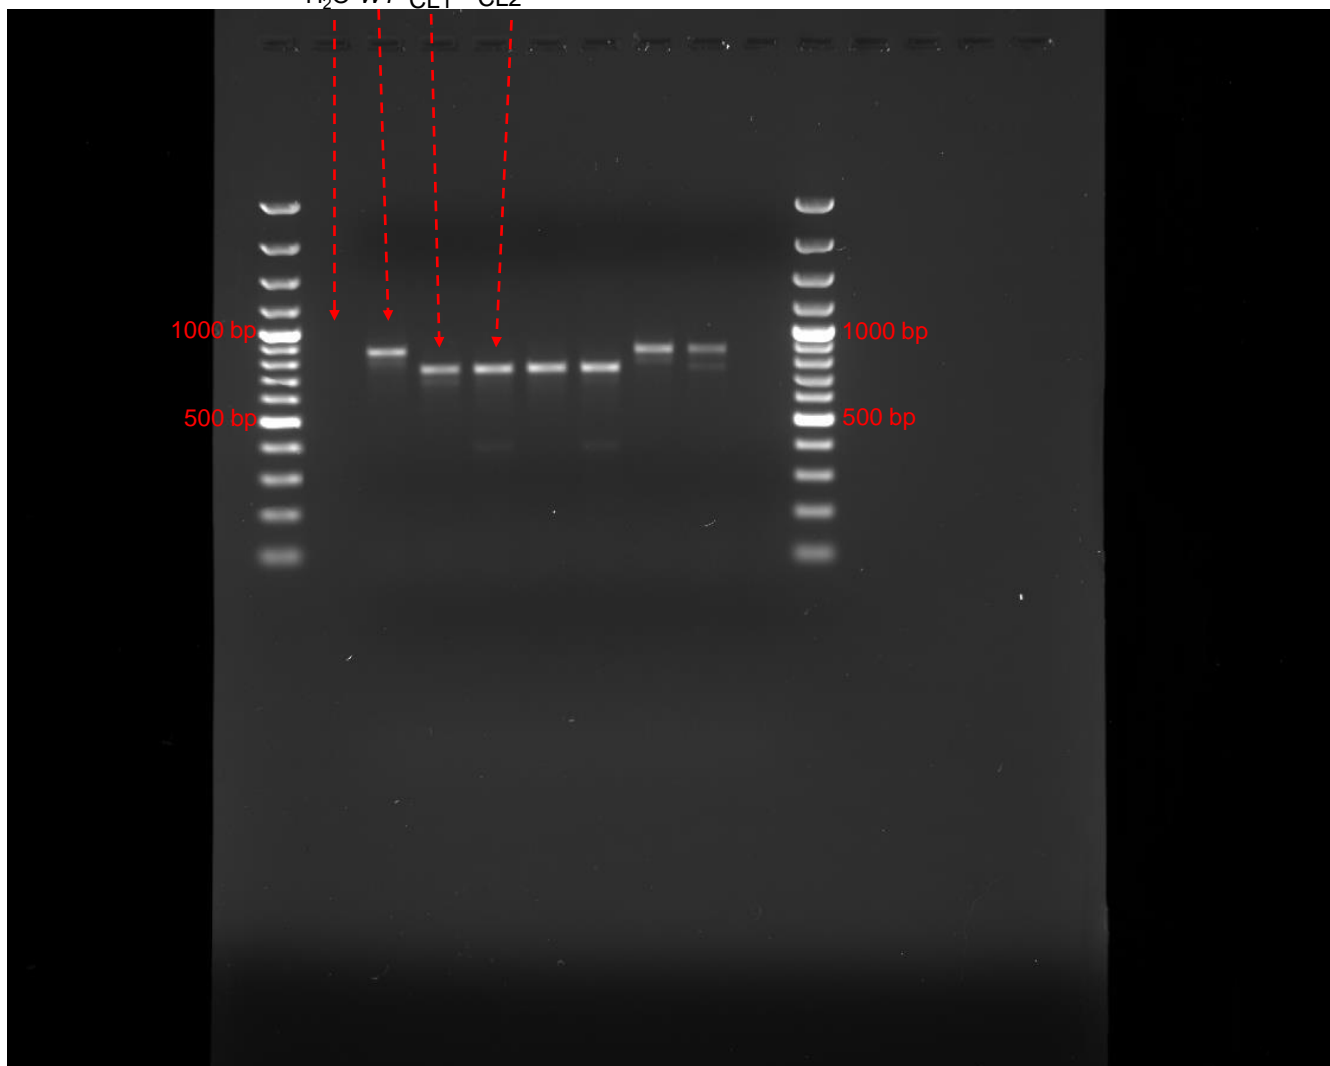



**Full unedited blot for Figure S7D, antibody against RAB3A, WT and *dex30* CL1**

Lanes corresponding to the cropped image

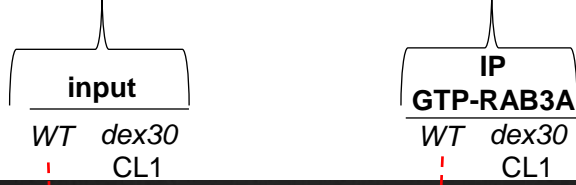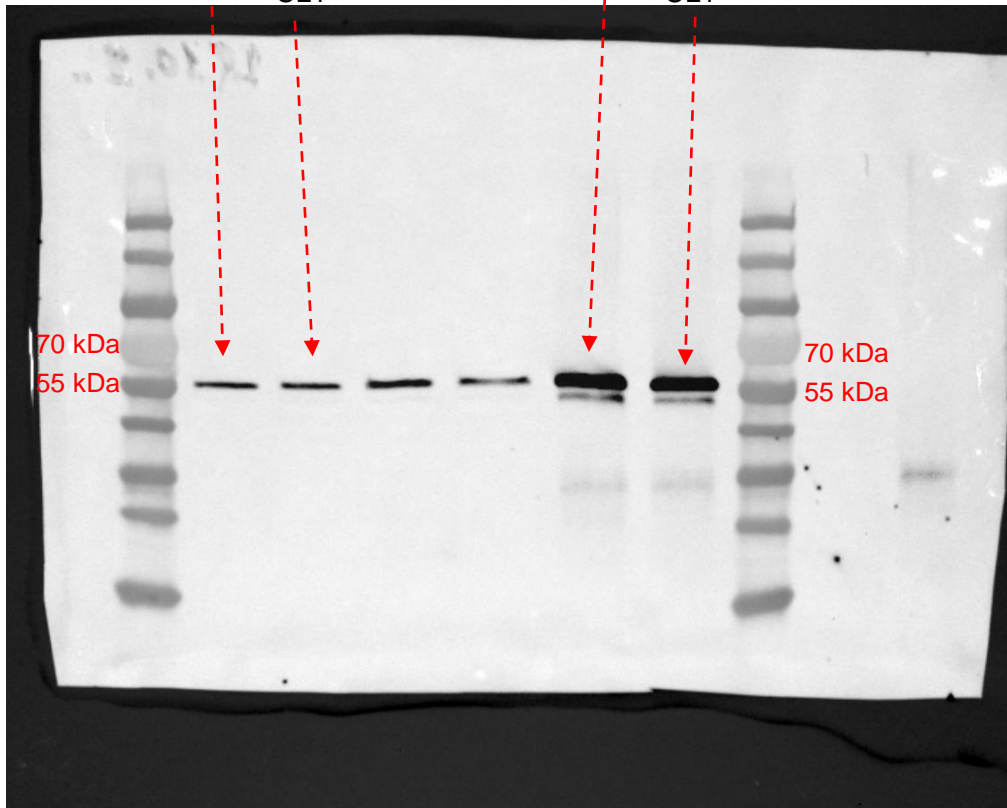

**Full unedited blot for Figure S7D, antibody against RAB3A, *dex30* CL2**

2 non-contiguous lanes corresponding to the cropped image

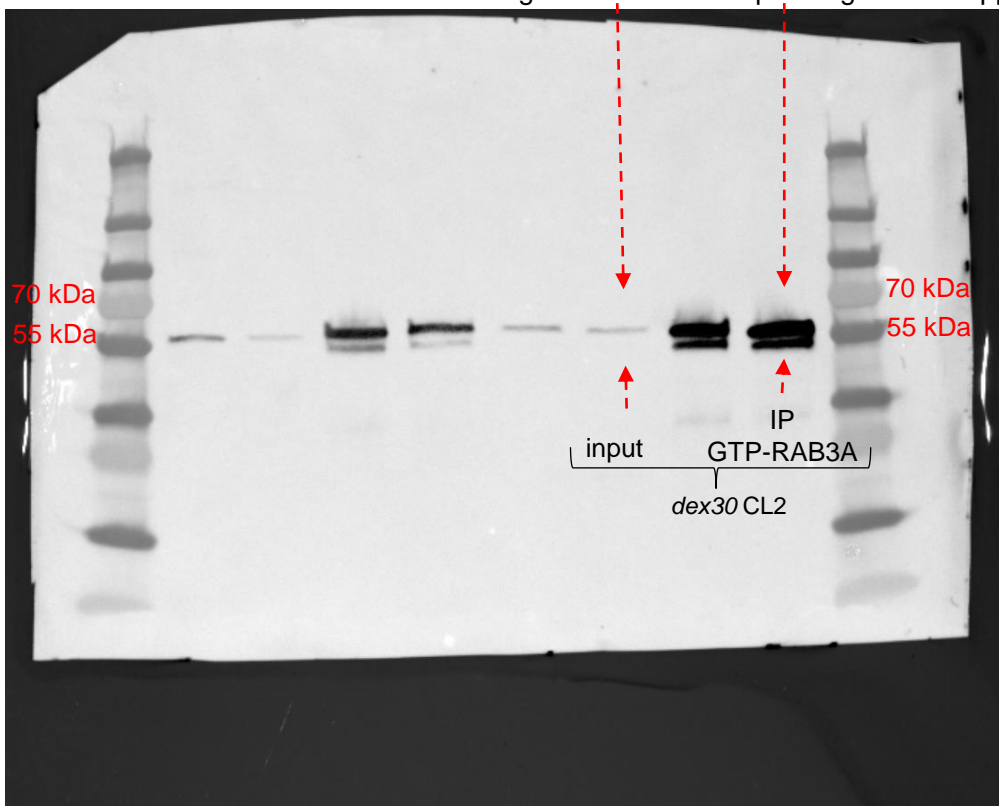

Supplement: jciinsight-9-167598-s175.pdf [file jciinsight-9-167598-s175.pdf]
