# Supplementary material for: A splice site variant in MADD affects hormone expression in pancreatic β cells and pituitary gonadotropes
Source: JCI Insight. 2024 May 22;9(10):e167598. doi: 10.1172/jci.insight.167598 (PMC11141940; doi:10.1172/jci.insight.167598)
Supplement: Supplemental data [file jciinsight-9-167598-s174.pdf]

**A splice-site variant in *MADD* affects hormone expression in  
pancreatic  $\beta$ -cells and pituitary gonadotropes**

**Supplemental material**

**Table of Contents**

Clinical description of the patients ..... 2

Supplemental Figures ..... 4

Supplemental Tables.....15

Supplemental Methods.....22

Supplemental References .....28

## Clinical description of the patients

### *Patient 1.*

The index patient (individual V3 in Fig. 1A) was the third child born to first cousins once removed. The pregnancy and birth were uncomplicated, and the weight at birth was approximately 3.5 kg. The neonatal phase was normal, but the patient developed seizures at the age of 6-7 months and received phenobarbital until the age of 9 years. She had a developmental delay, and she started walking and speaking single words at the age of 3-3.5 years. A computerized tomography scan at the age of 9 years was interpreted as normal. At the age of 12 years, she understood simple verbal instructions and spoke ~20 words. Her motor function was normal. She had slightly elevated palate, low-positioned ears, and somewhat low hairline. No body measurements before the age of 12 years were available, but between 12-14 years she grew 0.7 SD below her target height at -1.4 SD. At the age of 14 years elevated HbA1c level of 52 mmol/mol was observed, and an oral glucose tolerance test (OGTT) was performed. Her fasting plasma glucose level was 7.6 mmol/l and 2 hours after glucose challenge it remained 14.1 mmol/l, reaching the threshold of diabetes. OGTT was repeated at the age of 15 years with assessment of insulin and C-peptide levels which were considered normal: (fasting insulin 5.4 mU/l, 2h post glucose: 117.0 mU/l; fasting C-peptide 0.49 nmol, 2h post glucose: 3.86 nmol). Her fasting and 2h plasma glucose remained high, 7.9 mmol/l and 18.1 mmol/l, respectively. Levels of type-1 diabetes autoantibodies were within normal limits (islet cell autoantibodies 0 Juvenile Diabetes Foundation (JDF) units, glutamic acid decarboxylase antibodies 0.10 Relative Units (RU), insulin autoantibodies 10%). These results suggested that the patient had insulin resistance, which her beta cells failed to compensate. She was diagnosed with diabetes mellitus and treated with metformin. Between 15-19 years of age her HbA1c levels remained high (46-53 mmol/mol).

At the age of 14 years, the patient was pre-pubertal with no breast development or pubic hair, and a hormonal workup was conducted. Her serum estradiol level was prepubertal (0.008 nmol/l). Her basal LH level was notably low (0.1 IU/L) with maximal increase to 1.7 IU/l after stimulation with GnRH. These findings were suggestive of gonadotropin deficiency, and the patient started estrogen therapy. Her basal FSH level was 1.6 IU/l with maximal increase to 8.4 IU/l after GnRH stimulation. Patient's serum IGF-1 level was low (9.3 nmol/l). Her basal GH level was <0.05 µg/l with maximal increase to 0.94 µg/l after arginine stimulation, indicating GHD. However, she did not receive GH therapy. Her thyroid and adrenal functions were normal. MRI of the brain and the olfactory tract did not reveal anomalies.

At the age of 19 years the patient's puberty was incomplete despite estrogen therapy (M3P3 according to the Tanner scale). GnRH test revealed persistent low LH response (from <0.1 IU/l to 2.0 IU/l after GnRH stimulation). These findings were consistent with CHH. Patient's FSH level increased from 2.0 IU/l to 9.2 IU/l after GnRH stimulation. The estrogen therapy induced some acceleration of growth, and by the age of 19 years the patient had reached her target height. However, repeated arginine test revealed subnormal GH response (from 0.66 µg/l to 3.01 ug/l after arginine stimulation), confirming GHD.

#### *Patient 2.*

An elder brother of patient 1, (individual V2 in Fig. 1A) had severe developmental delay and epilepsy. Brain MRIs were performed at the ages of 7 and 21 years with normal findings. Elevated fasting plasma glucose level of 6.5 mmol/l and HbA1c level of 46 mmol/mol was first observed at the age of 21 years. At the age of 28 years the patient developed polyuria. Substantially elevated fasting plasma glucose level of 14.7 mmol/l and HbA1c level of 73 mmol/mol were observed, and metformin was introduced.

At the age of 21 years the patient had pre-pubertal penis and testes and he lacked pubic hair. Hormonal workup revealed prepubertal levels of testosterone (0.3 nmol/l) and LH (<0.5 IU/l), indicating absent puberty due to CHH. Patient's IGF-1 level was suggestive of GHD (10.3 nmol/l). His thyroid function was normal.

# Supplemental Figures

## Supplemental Figure 1

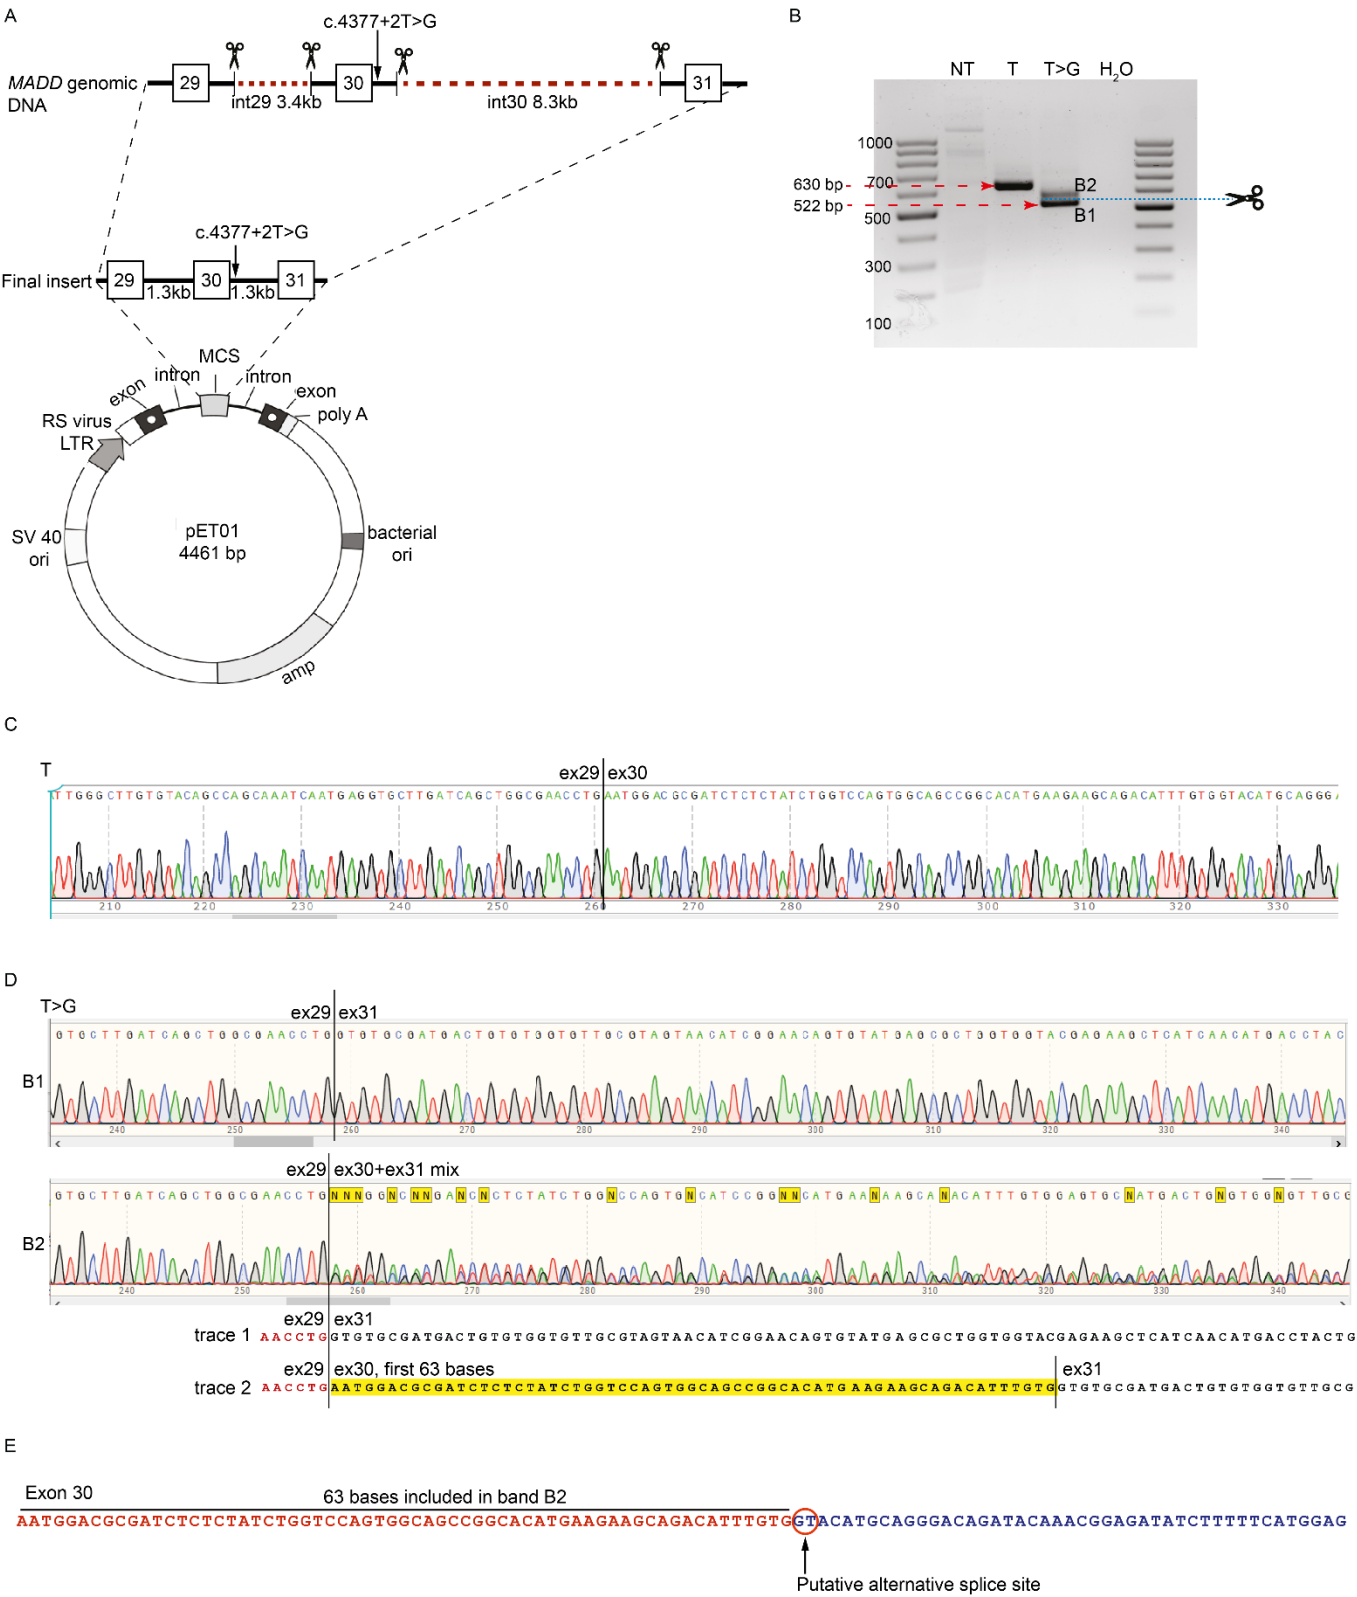

**Figure S1. A minigene assay confirms the effect of *MADD* c.4377+2T>G variant on splicing.**

(A) A Schematic of the pET01-vector-based construct used in the minigene assay. Insert containing *MADD* exons 29-31 and part of the surrounding intronic sequences with c.4377+2T or c.4377+2T>G variant were inserted in the multiple cloning site (MCS) surrounded by introns and exons. Due to size restrictions, 2040 bp of intron 29 and 7065 bp of the intron 30 had to be trimmed off (marked with a dark red dashed line). (B) c.4377+2T (T) and c.4377+2T>G (T>G) constructs were transiently expressed in HEK293 cells, and the inclusion of exon 30 was assessed by RT-PCR with primers specific to pET01-vector exons. An agarose gel electrophoresis shows that the T-construct produces one band with size of 630 bp corresponding to inclusion of all three *MADD* exons, whereas construct with T>G variant produces two bands, one with size of 522 bp corresponding to complete skipping of exon 30 (B1) and one of intermediate size (B2). B1 and B2 bands were separately purified from the gel. (C-D) The PCR product produced by the T-construct and the gel-purified B1 and B2 bands produced by T>G construct were Sanger sequenced. (C) Cells transfected with the T-construct express mRNA containing *MADD* exon 30. (D) B1 band from cells transfected with T>G construct corresponds to mRNA where exon 30 is completely skipped. B2 band chromatogram reveals two traces, one showing complete skipping of exon 30 (possibly due to incomplete separation of B1 and B2 bands), whereas the second trace consists of 63 first bases of exon 30 followed by exon 31. (E) The 63 first bases of exon 30 are followed by a GT-site, which the cells appear to have used as an alternative splice donor site in the minigene assay. However, as several kilobases of intronic sequences were deleted from the constructs, possibly removing regulatory sequences that affect recognition of splice sites, and as complete skipping of exon 30 was observed in RT-PCR with patient-derived RNA (Figure 1D-E), it is not likely that the mRNA with partial inclusion of exon 30 is highly expressed in vivo.

Supplemental Figure 2

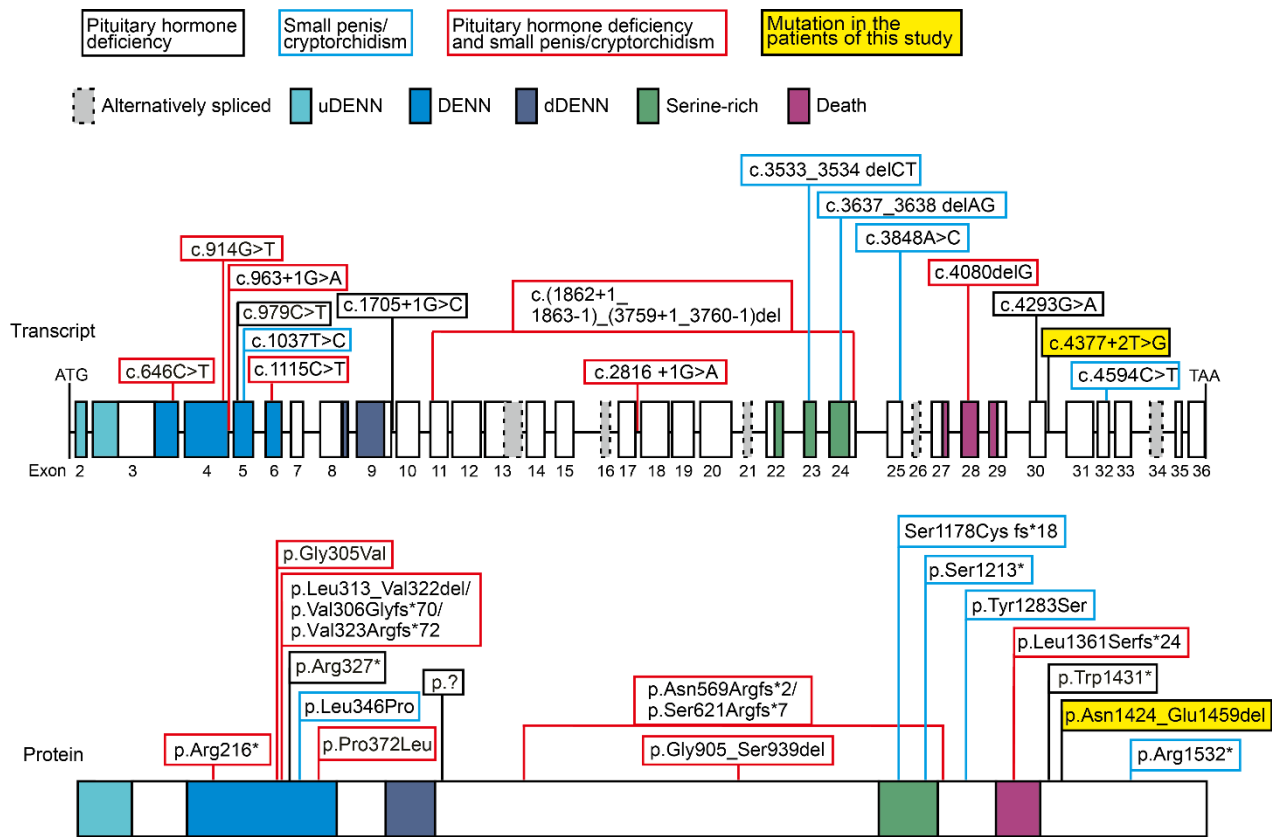

**Figure S2. Biallelic mutations in *MADD* causing hypopituitarism and small penis/cryptorchidism**  
A schematic of *MADD* transcript and protein with the current and previously reported biallelic mutations in patients with hypopituitarism and/or small penis and cryptorchidism. Alternatively spliced exons and subunits of the DENN-domain (uDENN, DENN and dDENN), serine-rich-domain and Death-domain are indicated. Not in scale. Modified from Figure 1 of Supplemental reference (1).

## Supplemental Figure 3

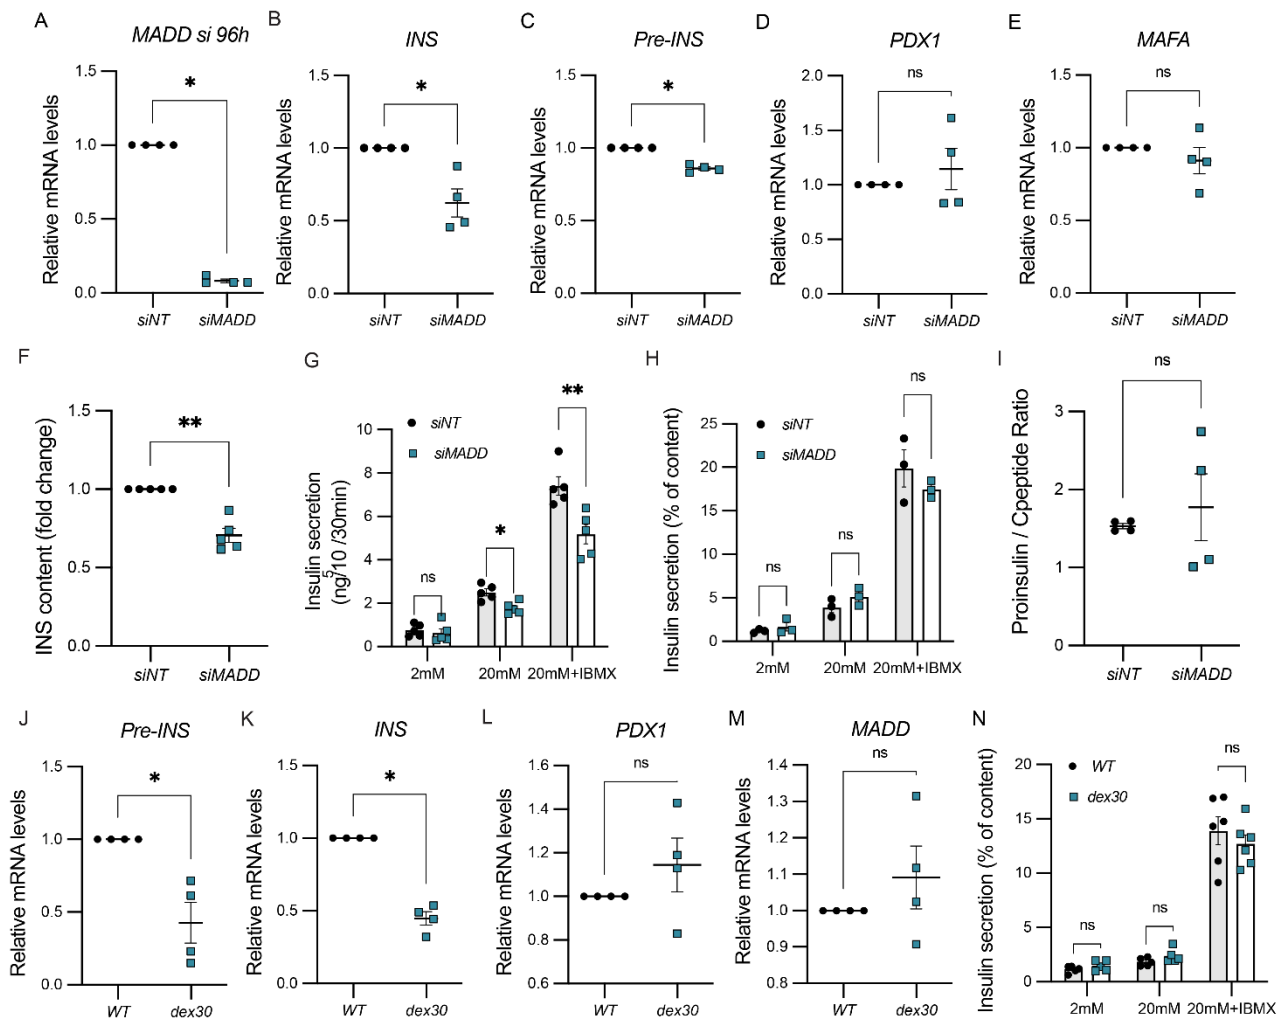

**Figure S3. Silencing of *MADD* expression in EndoC-βH1 cells causes decreased insulin content.** (A-E) Relative mRNA expression after 96 h treatment with non-targeting (siNT) or *MADD*-specific (siMADD) siRNAs in EndoC-βH1 cells (n=4). (A) *MADD*, (B) *INS*, (C) *Pre-INS*, (D) *PDX1* and (E) *MAFA*. (F) Insulin content in siMADD treated EndoC-βH1 cells expressed as fold-change to siNT-treated cells (n=5). (G-H) Insulin secretion from siNT and siMADD-treated EndoC-βH1 cells in 2mM glucose, 20 mM glucose and 20 mM glucose with IBMX. (G) as per 10<sup>5</sup> cells (n=5) (H) as % of insulin content, (n=3). (I) Proinsulin-to-C-peptide ratio in siNT and siMADD-treated EndoC-βH1 cells (n=4). (J-M) Relative mRNA expression of (J) *Pre-INS*, (K) *INS*, (L) *PDX1* and (M) *MADD* in wild type and *dex30* EndoC-βH1 cells (n=4). (N) Static insulin secretion from WT and *dex30* EndoC βH1 cells as % of insulin content in 2mM glucose, 20 mM glucose and 20 mM glucose with IBMX (n=6). \*\*p<0.01, \*p<0.05 analyzed by Student's *t*-test (A-F, I-M) or multiple *t*-tests (G-H, N).

Supplemental Figure 4

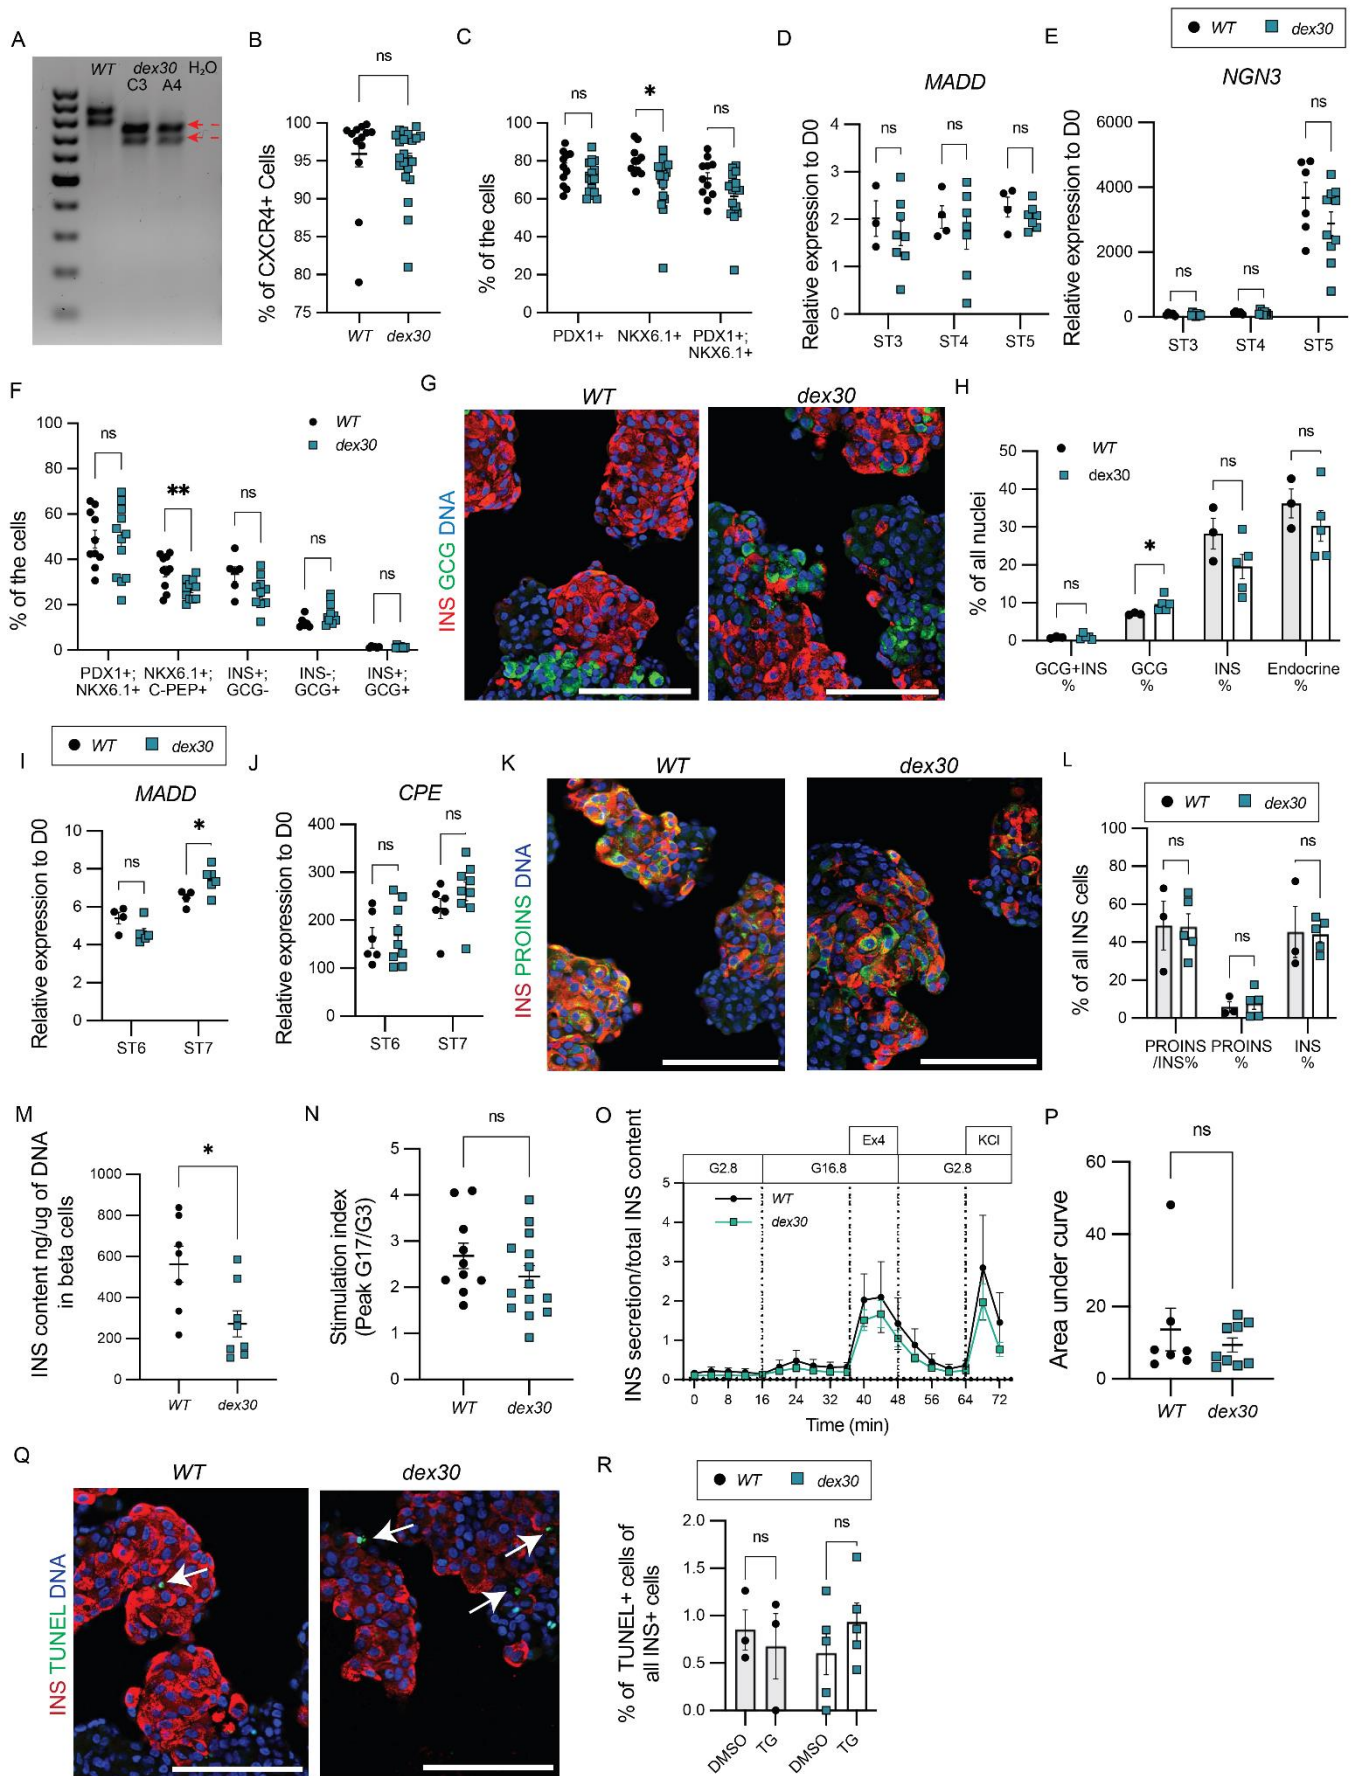

**Figure S4. Differentiation of WT and *dex30* hESCs to SC-islets.** (A) RT-PCR with primers targeting around *MADD* exon 30 showing truncated transcript in two homozygous hESC clones C3 and A4. The two bands indicate the expression of two *MADD* splice isoforms (with and without alternatively spliced exon 34). (B) Flow cytometry with CXCR4 surface marker at definitive endoderm stage (ST1) (n=13 in WT, n=22 in *dex30*), (C) Flow cytometry with PDX1 and NKX6.1 antibodies at pancreatic progenitor stage (ST4) (n=11 in WT, n=17 in *dex30*). (D-E) mRNA expression levels of (D) *MADD*, (E) *NGN3* during pancreatic progenitor stages ST3, ST4 and ST5 relative to non-differentiated cells (n=3-6 in WT, n=7-10 in *dex30*). (F) Flow cytometry with PDX1-, NKX6.1-, C-peptide (CPEP)-, insulin (INS)- and glucagon (GCG)-specific antibodies in WT and *dex30* SC-islets at ST7 w3 (n=6-10 in WT, n=10-12 in *dex30*). (G) Immunohistochemistry with insulin and glucagon-specific antibodies at ST7 SC-islets Scale bars 100  $\mu$ m. (H) Quantification of insulin<sup>+</sup>glucagon<sup>+</sup> double positive (GCGINS%), glucagon<sup>+</sup> only (GCG%), insulin<sup>+</sup> only (INS%) or all these together (endocrine) as a % of all nuclei (n=3 for WT and n=5 for *dex30*). (I-J) mRNA expression levels of (I) *MADD*, (J) *CPE* at stages 6-7, relative to non-differentiated cells (n=4-6 for WT and n=6-9 for *dex30*). (K) Immunohistochemistry with insulin (red) and proinsulin (green)-specific antibodies in WT and *dex30* SC-islets. Scale bars 100  $\mu$ m. (L) Quantification of proinsulin<sup>+</sup>insulin<sup>+</sup> double positive (ProINSINS%), proinsulin<sup>+</sup> only (PROINS%) and insulin<sup>+</sup> only (INS%) as % of all insulin positive cells (n=3 for WT, n=5 for *dex30*). (M) Insulin content ng/ug of DNA in  $\beta$ -cells (n=7 for WT, n=8 for *dex30*). (N) Stimulation index (peak dynamic insulin secretion at G16.8/G2.8) in WT and *dex30* SC-islets (n=10 for WT, n=14 for *dex30*). (O) Dynamic insulin secretion in Stage 7 SC-islets as % of total insulin content in 2.8mM glucose, 16.8mM glucose, 16.8mM glucose+50mM Exendin 4 (Ex4) and 2.8 mM glucose+30mM KCL (n=7 for WT, n=9 for *dex30*). (P) Area under curve quantification of secretion curves in O. (Q) Detecting apoptosis in Thapsigargin-treated WT and *dex30* INS<sup>+</sup> cells at ST7 with terminal deoxynucleotidyl transferase-mediated dUTP nick end labeling (TUNEL) assay. Scale bars 100  $\mu$ m. (R) Quantification of TUNEL-positive cells (n=3 for WT, n=5 for *dex30*). \* p<0.05, \*\* p<0.01 analysed by Student's *t*-test (B, M-N, P) or multiple *t*-tests (C-F, H-J, L, R).

## Supplemental Figure 5

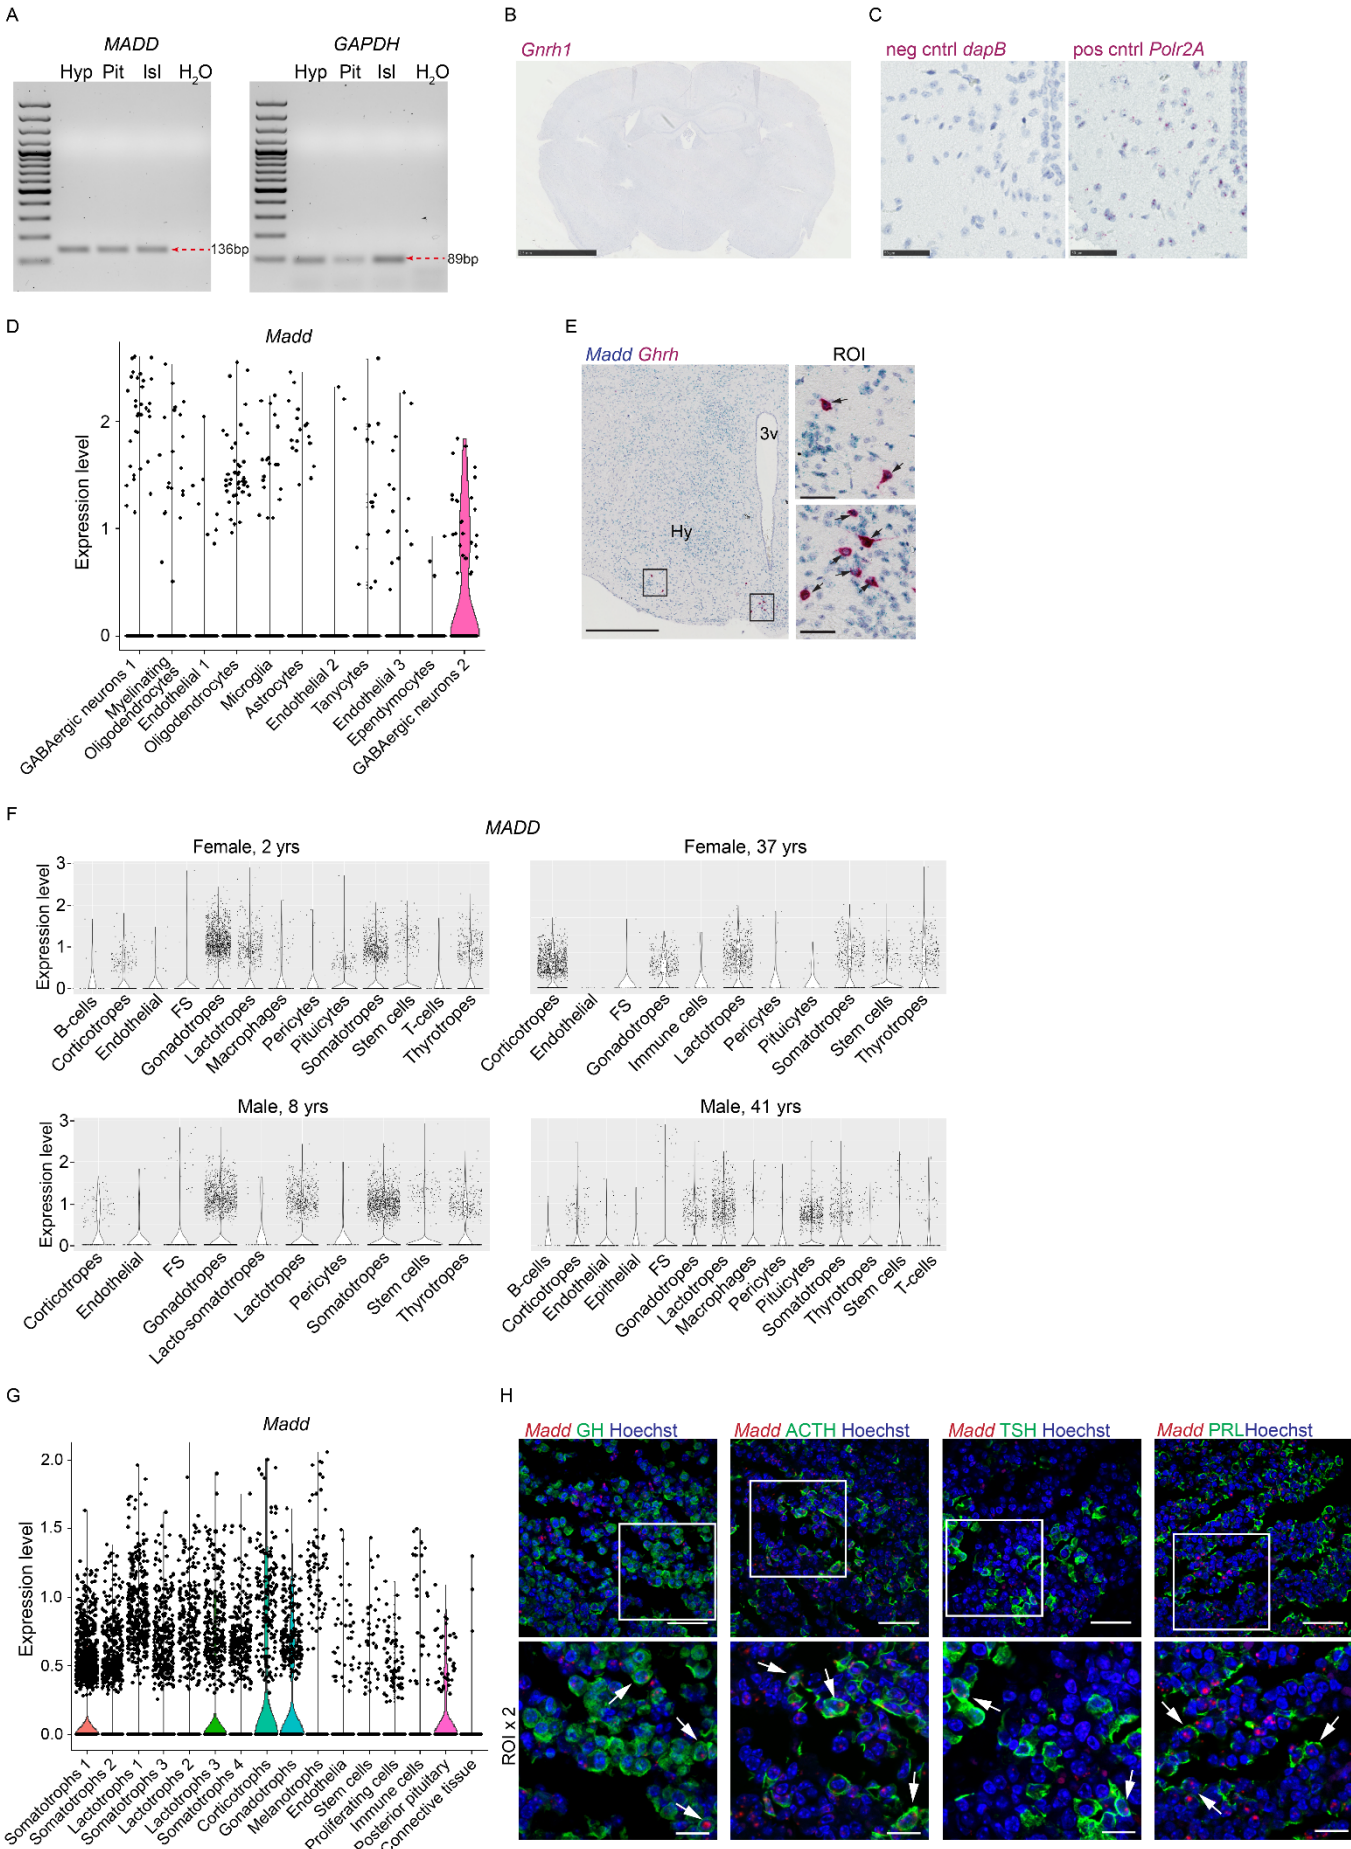

**Figure S5. *MADD* transcripts are expressed in hypothalamus and pituitary.** (A) *MADD* expression in human hypothalamic and pituitary cDNA libraries and cadaveric islet cDNA determined by RT-PCR. Hyp: hypothalamic cDNA, Pit: pituitary cDNA, Isl: islet cDNA. Expected sizes: *MADD*: 136 bp, *GAPDH*: 89 bp. The lanes with *MADD* and *GAPDH* RT-PCR products were run on the same gel but were non-contiguous. Lanes from the same gel are shown in Figure 2A. (B) RNAscope mRNA in situ hybridization using probe against *Gnrh1* (red) in adult mouse brain, coronal section shows absence of signal in caudal section. Scale bar 2.5 mm. (C) RNAscope mRNA in situ hybridizations using probes against bacterial gene *dapB* (red) and housekeeping gene *Polr2A* (red) as negative and positive controls, respectively. Scale bars 50  $\mu$ m. (D) A violin plot showing expression of *Madd* transcripts in cell clusters identified from single-cell RNA-seq data from adult mouse hypothalamus. (E) A representative RNAscope mRNA in situ hybridization using probes against *Madd* (blue) and *Ghrh* (red) in adult mouse hypothalamus, coronal section. Arrows indicate examples of double-positive cells. 3v, 3rd ventricle, Hy, hypothalamus. Scale bar full size image 500  $\mu$ m, ROIs 50  $\mu$ m. (F-G) Violin plots showing expression of *MADD* transcripts in cell clusters identified from single-cell RNA-seq data from (F) pediatric and adult human pituitaries and (G) adult mouse pituitary. FS=Folliculostellate cells. (H) RNAscope RNA in situ hybridization of *Madd* (red) combined with immunostainings of different pituitary hormones (green) in adult mouse anterior pituitary. GH: growth hormone, ACTH: adrenocorticotrophic hormone, TSH: thyroid-stimulating hormone, PRL: prolactin. Arrows indicate examples of double-positive cells. Scale bars: 50  $\mu$ m; ROI 15  $\mu$ m. RNAscope mRNA in situ hybridizations for *Gnrh1*+*Madd* were repeated >10 times, and for other hormones+*Madd* for 5-8 times.

## Supplemental Figure 6

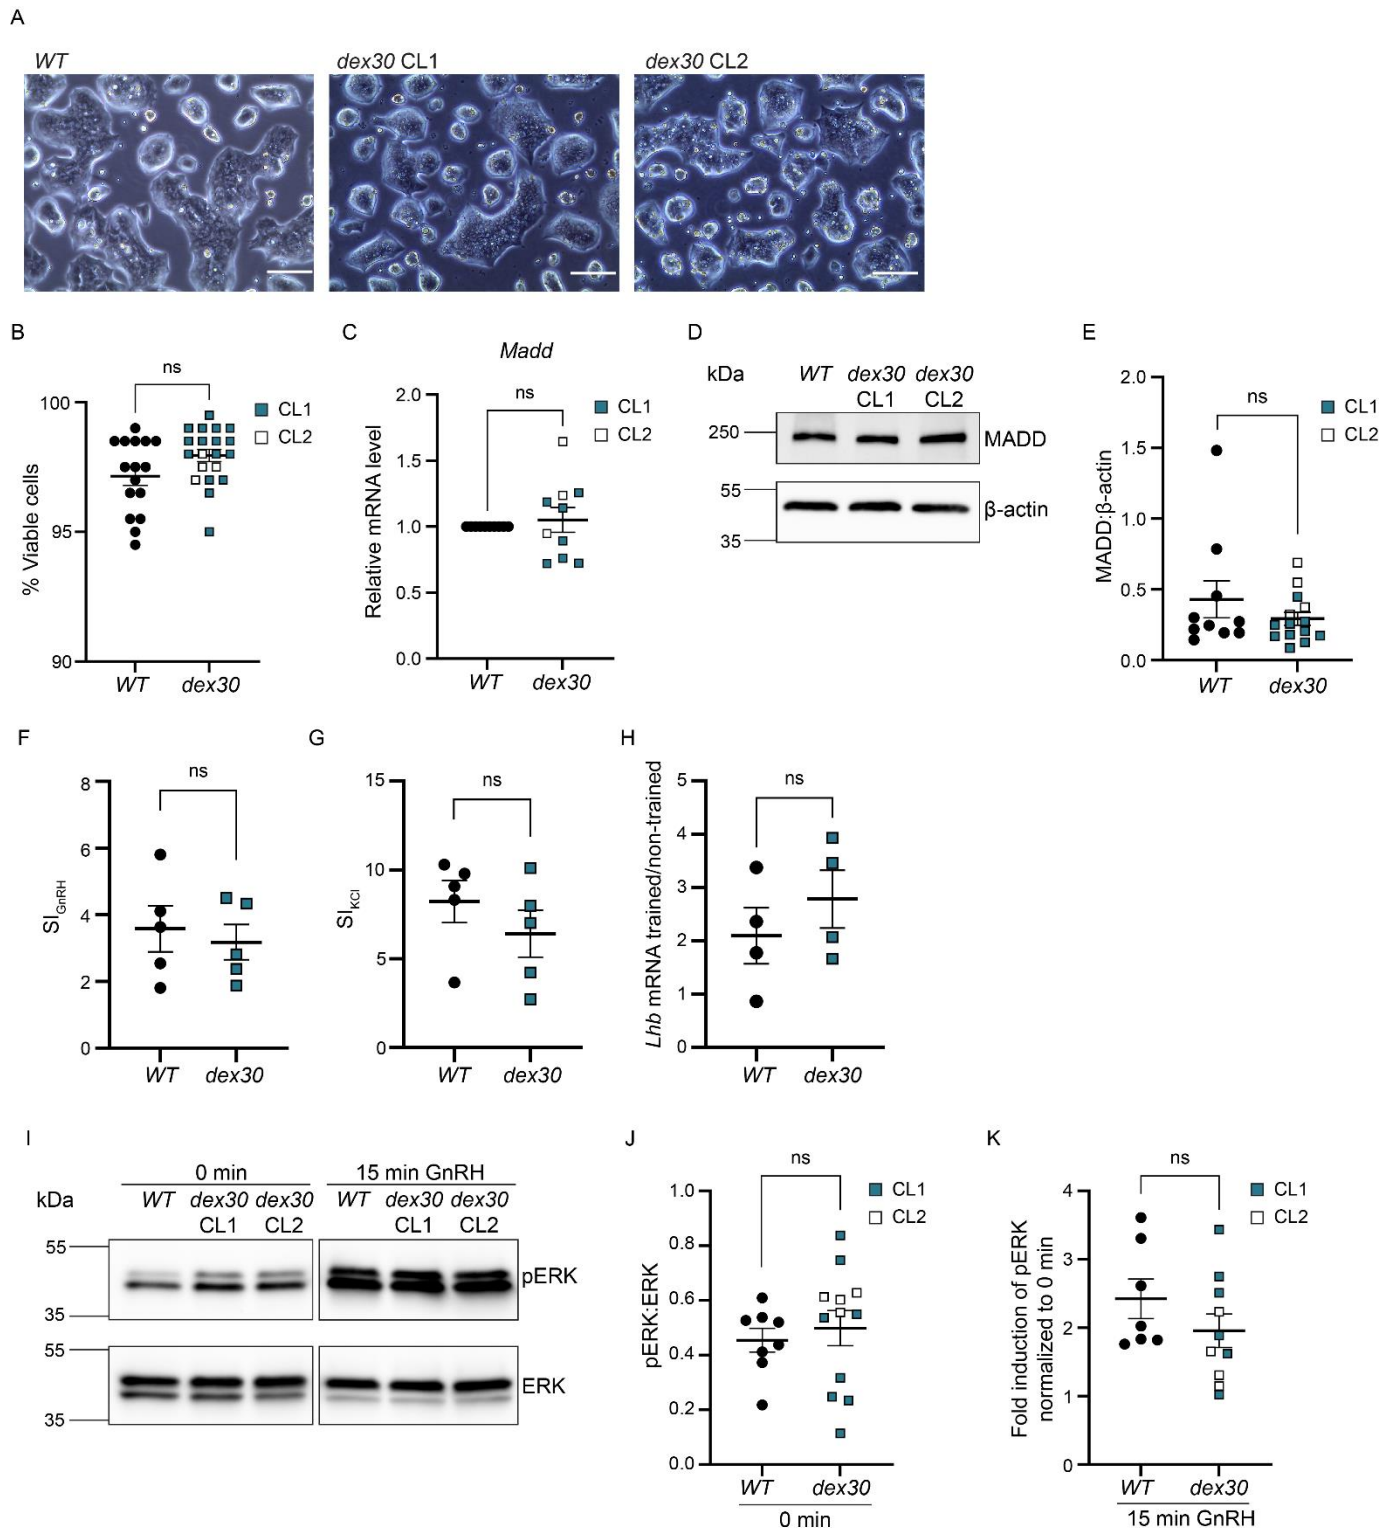

**Figure S6. *Dex30* LβT2 cells' morphology, viability and levels of *Madd* mRNA and protein are comparable to WT, and they retain functional secretion machinery and responsivity to GnRH.** (A) Light microscopy showing morphology of wild type LβT2 cells and two *dex30* clones. Scale bars 10 μm. (B) Viability of wild type and *dex30* LβT2 cells determined by Trypan blue staining (n=16 for WT, n=20 for *dex30*). (C) Relative mRNA expression of *Madd* in wild type and *dex30* LβT2 cells (n=10). (D) A representative immunoblot showing MADD protein levels in wild type and *dex30* LβT2 cells. (E)

Quantification of MADD immunoblot band intensities normalized to  $\beta$ -actin in wild type and *dex30* L $\beta$ T2 cells (n=10 for WT, n=14 for *dex30*). **(F-G)** Stimulation indices (ng LH secreted by stimuli/ng LH secreted spontaneously) of WT and *dex30* L $\beta$ T2 cells stimulated with **(F)** 50 nM GnRH or **(G)** 60 mM KCl (n=5). **(H)** Relative increase of *Lhb* mRNA expression in WT L $\beta$ T2 cells and *dex30* clone 1 after 3-days of training with pulsatile GnRH-stimulations (n=4). **(I)** A representative immunoblot showing phosphorylated and total ERK1/2 in WT and *dex30* L $\beta$ T2 cells before and after 15 min stimulation with 50 nM GnRH. **(J)** Quantification of phospho-ERK1/2 band intensities before GnRH stimulation, normalized to total ERK1/2 (n=8 for WT, n=12 for *dex30*). **(K)** Fold induction of ERK1/2 phosphorylation after 15 min GnRH stimulation, normalized to total ERK1/2 (n=7 for WT, n=10 for *dex30*). ns  $p \geq 0.05$ , analyzed by Student's *t*-test.

## Supplemental Figure 7

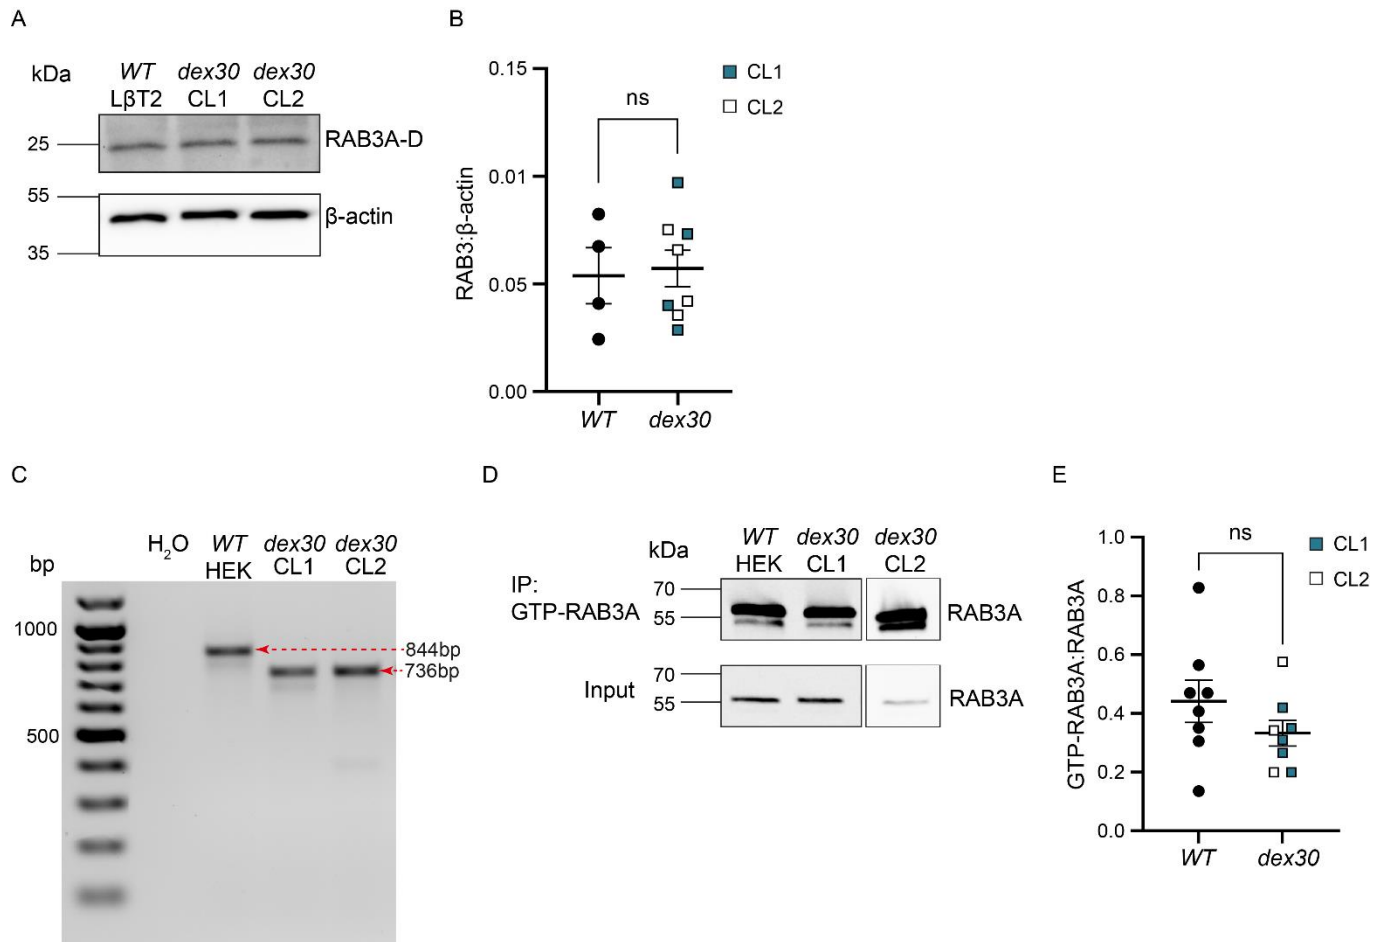

**Figure S7. *Dex30* does not affect stability or activation of RAB3 small GTPases.** (A) A representative immunoblot showing RAB3A-D protein expression in WT and *dex30* LβT2 cells. (B) Quantification of RAB3 immunoblot band intensities normalized to β-actin in wild type and *dex30* LβT2 cells (n=4). (C) A cDNA PCR with primers targeting around *MADD* exon 30 showing truncated transcript in two homozygous HEK293 clones. (D) A representative immunoblot showing activated GTP-bound (IP) and total (Input) RAB3A-EGFP transiently expressed in wild type and *dex30* HEK293-cells. (E) Quantification of band intensities of GTP-RAB3A in WT and *dex30* HEK293 cells, normalized to total RAB3A (n=8). ns  $p \geq 0.05$ , analysed by Student's t-test.

## Supplemental Tables

**Supplemental Table 1. Single nucleotide variants homozygous in the affected patients and heterozygous in their parents, with minor allele frequency (MAF) <1% in the 1000 Genomes database.**

| Gene name      | Variant type | Transcript     | Nucleotide change | Protein Change         | Frequency (gnomAD) | Predicted impacts |                              |                   |
|----------------|--------------|----------------|-------------------|------------------------|--------------------|-------------------|------------------------------|-------------------|
|                |              |                |                   |                        |                    | BGI               | SIFT                         | PolyPhen2         |
| <i>RASAL2</i>  | Silent       | NM_170692.2    | c.876T>A          | p.(Ser292Ser)          | 0.0007548          | Low               | NA                           | NA                |
| <i>RASAL2</i>  | Silent       | NM_170692.2    | c.3420C>G         | p.(Arg1140Arg)         | 0.0006719          | Low               | NA                           | NA                |
| <i>SLC1A2</i>  | Silent       | NM_004171.3    | c.1368C>T         | p.(Ala456Ala)          | 0.001409           | Low               | NA                           | NA                |
| <i>ACCSL</i>   | Missense     | NM_001031854.2 | c.1630C>T         | p.(Arg544Cys)          | 0.0009298          | Moderate          | deleterious                  | possibly damaging |
| <i>TSPAN18</i> | Missense     | NM_130783.4    | c.232C>T          | p.(Arg78Cys)           | 0.00003548         | Moderate          | deleterious (low confidence) | probably damaging |
| <i>MADD</i>    | Splice-site  | NM_003682.4    | c.4378T>G         | p.(Asn1424_Glu1459del) | NA                 | High              | NA                           | NA                |
| <i>RTN3</i>    | Missense     | NM_001265589.1 | c.2057C>T         | p.(Thr686Ile)          | 0.000003988        | Moderate          | tolerated                    | benign            |
| <i>ESRRA</i>   | Silent       | NM_001282450.1 | c.1035C>T         | p.(Ala345Ala)          | 0.00005391         | Low               | NA                           | NA                |
| <i>DPF2</i>    | Silent       | NM_006268.4    | c.924A>G          | p.(Gln308Gln)          | 0.00009554         | Low               | NA                           | NA                |
| <i>TIGD3</i>   | Missense     | NM_145719.2    | c.475C>A          | p.(Gln159Lys)          | 0.03107            | Moderate          | tolerated                    | benign            |
| <i>MAP3K11</i> | Missense     | NM_002419.3    | c.2380C>T         | p.(Pro794Ser)          | NA                 | Moderate          | deleterious (low confidence) | benign            |
| <i>LRP5</i>    | Silent       | NM_002335.3    | c.2445C>T         | p.(Asp815Asp)          | 0.0005352          | Low               | NA                           | NA                |
| <i>IGHMBP2</i> | Silent       | NM_002180.2    | c.726C>G          | p.(Ala242Ala)          | 0.002477           | Low               | NA                           | NA                |
| <i>LTO1</i>    | Silent       | NM_153451.2    | c.135T>C          | p.(His45His)           | 0.0006328          | Low               | NA                           | NA                |

**Supplemental Table 2. In silico predictions of the effects of NM\_003682.4 c.4377+2T>G variant on splicing**

| In silico tool               | c.4377+2T (wild type) score | c.4377+2T>G variant score | Change  | Settings                                                      |
|------------------------------|-----------------------------|---------------------------|---------|---------------------------------------------------------------|
| HSF matrices                 | 89.9                        | 63.06                     | -29.86% | consensus value (CV) threshold 65, variation threshold +/-10% |
| HSF MaxEntScan               | 9.65                        | 2                         | -79.27% | CV threshold 3, variation threshold +/-30%                    |
| Splice AI delta <sup>A</sup> | NA                          | 1.00                      | -1.00   | Default                                                       |
| Pangolin delta <sup>A</sup>  | NA                          | 0.88                      | -0.88   | Default                                                       |
| NNSplice                     | 0.96                        | 0.00                      | -0.96   | Donor score cutoff 0.40                                       |
| HAL Splice Prediction        | 99.0                        | 0.00                      | -99.0   | Wild type PSI 99.0                                            |
| Spliceator                   | 0.99                        | 0.00                      | -0.99   | Reliability: 98% Model: 200                                   |

<sup>A</sup>Splice AI and Pangolin delta scores describe the probability of splice site loss.

**Supplemental Table 3. All high confidence interactors of wild type and *dex30* MADD.**

See separate Excel file.

**Supplemental Table 4. Significantly enriched GO biological processes in the interactome of *MADD*.**

Cutt-offs: Fold enrichment > 2; False Discovery Rate (FDR) <0.05

| GO biological process                                                                                                   | Fold enrichment | FDR         |
|-------------------------------------------------------------------------------------------------------------------------|-----------------|-------------|
| GO:1900740 Positive regulation of protein insertion into mitochondrial membrane involved in apoptotic signaling pathway | 116.8           | 6.15E-07    |
| GO:0007165 Signal transduction                                                                                          | 3.0             | 0.009486765 |
| GO:0034613 Cellular protein localization                                                                                | 16.0            | 0.009486765 |
| GO:0006605 Protein targeting                                                                                            | 21.2            | 0.017668109 |
| GO:0010737 Protein kinase A signaling                                                                                   | 38.9            | 0.022142903 |
| GO:0007188 Adenylate cyclase-modulating G-protein coupled receptor signaling pathway                                    | 16.5            | 0.031231133 |
| GO:0043547 Positive regulation of GTPase activity                                                                       | 7.2             | 0.044522384 |
| GO:0051726 Regulation of cell cycle                                                                                     | 5.8             | 0.044522384 |

**Supplemental Table 5. Up to 50 significantly over-represented pathways in the interactome of *MADD***

See separate Excel file.

**Supplemental Table 6. Annotations of high confidence interacting partners of *MADD***

See separate Excel file.

**Supplemental Table 7. List of high confidence interacting partners with significantly different relative abundances in protein complexes isolated from *dex30* and WT *MADD* expressing-cells**

Members of the same protein family or subunits of the same protein complex are highlighted with the same color.

| Gene           | Full protein name                                            | Detection method | p-value  | Fold change <i>dex30</i> /WT |
|----------------|--------------------------------------------------------------|------------------|----------|------------------------------|
| <i>ALDH1A2</i> | Retinal dehydrogenase 2                                      | BioID            | 0.042812 | 0.731                        |
| <i>ARHGEF7</i> | Rho guanine nucleotide exchange factor 7                     | BioID            | 0.005868 | 0.000                        |
| <i>BUB1B</i>   | Mitotic checkpoint serine/threonine-protein kinase BUB1 beta | BioID            | 0.002587 | 0.272                        |
| <i>HGSNAT</i>  | Heparan-alpha-glucosaminide N-acetyltransferase              | BioID            | 0.027691 | 0.345                        |
| <i>HLA-E</i>   | HLA class I histocompatibility antigen, alpha chain E        | AP-MS            | 0.007982 | 0.000                        |
| <i>LRP4</i>    | Low-density lipoprotein receptor-related protein 4           | BioID            | 8.72E-06 | 0.000                        |
| <i>PROM1</i>   | Prominin-1                                                   | BioID            | 8.72E-06 | 0.000                        |
| <i>RAPGEF6</i> | Rap guanine nucleotide exchange factor 6                     | BioID            | 8.72E-06 | 0.000                        |
| <i>STRN</i>    | Striatin                                                     | BioID            | 8.72E-06 | 0.000                        |
| <i>SYT3</i>    | Synaptotagmin-3                                              | AP-MS            | 0.042208 | 0.000                        |
| <i>TAB1</i>    | TGF-beta-activated kinase 1 and MAP3K7-binding protein 1     | BioID            | 3.17E-05 | 0.382                        |
| <i>YWHAB</i>   | 14-3-3 protein beta/alpha                                    | AP-MS            | 0.000182 | 0.626                        |
| <i>YWHAB</i>   | 14-3-3 protein beta/alpha                                    | BioID            | 0.038002 | 0.836                        |
| <i>YWHAE</i>   | 14-3-3 protein epsilon                                       | AP-MS            | 0.002773 | 0.734                        |
| <i>YWHAG</i>   | 14-3-3 protein gamma                                         | BioID            | 0.000413 | 0.758                        |
| <i>YWHAG</i>   | 14-3-3 protein gamma                                         | AP-MS            | 0.012514 | 0.770                        |
| <i>YWHAH</i>   | 14-3-3 protein eta                                           | AP-MS            | 0.033286 | 0.810                        |
| <i>YWHAQ</i>   | 14-3-3 protein theta                                         | BioID            | 0.000615 | 0.624                        |
| <i>YWHAQ</i>   | 14-3-3 protein theta                                         | AP-MS            | 0.017998 | 0.786                        |
| <i>YWHAZ</i>   | 14-3-3 protein zeta/delta                                    | BioID            | 8.15E-05 | 0.674                        |
| <i>YWHAZ</i>   | 14-3-3 protein zeta/delta                                    | AP-MS            | 0.000592 | 0.555                        |

|                 |                                                                  |       |          |                     |
|-----------------|------------------------------------------------------------------|-------|----------|---------------------|
| <i>ARHGEF10</i> | Rho guanine nucleotide exchange factor 10                        | BioID | 0.036606 | 7.249               |
| <i>BAG5</i>     | BAG family molecular chaperone regulator 5                       | BioID | 8.71E-05 | $\rightarrow\infty$ |
| <i>FGFRL1</i>   | Fibroblast growth factor receptor-like 1                         | BioID | 0.020032 | 8.457               |
| <i>FLG</i>      | Filaggrin                                                        | AP-MS | 0.044523 | 5.328               |
| <i>GNAI1</i>    | Guanine nucleotide-binding protein G(i) subunit alpha-1          | AP-MS | 0.038618 | 5.328               |
| <i>GNAI3</i>    | Guanine nucleotide-binding protein G(k) subunit alpha            | AP-MS | 0.006312 | 2.291               |
| <i>GNB1</i>     | Guanine nucleotide-binding protein G(I)/G(S)/G(T) subunit beta-1 | AP-MS | 0.037612 | 4.186               |
| <i>GNB2</i>     | Guanine nucleotide-binding protein G(I)/G(S)/G(T) subunit beta-2 | AP-MS | 0.011858 | 6.660               |
| <i>PLAGL2</i>   | Zinc finger protein PLAGL2                                       | AP-MS | 0.030004 | 3.996               |
| <i>PPP4R2</i>   | Serine/threonine-protein phosphatase 4 regulatory subunit 2      | BioID | 0.001643 | 2.819               |
| <i>RAB21</i>    | Ras-related protein Rab-21                                       | BioID | 0.008996 | $\rightarrow\infty$ |
| <i>RPAP3</i>    | RNA polymerase II-associated protein 3                           | BioID | 0.002352 | 2.366               |
| <i>SLC25A10</i> | Mitochondrial dicarboxylate carrier                              | AP-MS | 0.01309  | 1.332               |
| <i>SSRP1</i>    | FACT complex subunit SSRP1                                       | AP-MS | 0.043881 | 4.440               |
| <i>STAT1</i>    | Signal transducer and activator of transcription 1-alpha/beta    | BioID | 0.011076 | 3.624               |
| <i>TMEM41B</i>  | Transmembrane protein 41B                                        | BioID | 0.047342 | 3.624               |
| <i>UNC45A</i>   | Protein unc-45 homolog A                                         | BioID | 0.033693 | 2.574               |
| <i>URB1</i>     | Nucleolar pre-ribosomal-associated protein 1                     | AP-MS | 0.040351 | 6.660               |
| <i>USP9X</i>    | Probable ubiquitin carboxyl-terminal hydrolase FAF-X             | AP-MS | 4.8E-05  | 23.976              |

**Supplemental Table 8. PCR primers used for amplification and sequencing of *MADD* transcripts**

| Amplicon number | Primers                                              | Amplicon size           |
|-----------------|------------------------------------------------------|-------------------------|
| 1               | Fw: GCCCTGATGCTTCTCTGAGA<br>Rv: CGATGTCTACTCGCTTCTGC | 848 bp                  |
| 2               | Fw: CTCCACCTTCCGAGAGTGTT<br>Rv: GATCTCCTGGCCCTCATGAA | 805 bp                  |
| 3               | Fw: GCTAGTGGATCTGGACAGCA<br>Rv: AGCTCGTCAATCTCCACCTC | 843 bp                  |
| 4               | Fw: TCCTCCCTTGGTGACTTTGT<br>Rv: TAACGCCCTCCTGTTTCCTT | 636-825 bp <sup>A</sup> |
| 5               | Fw: CCCTTCCCCAGTCTGAAAGT<br>Rv: CCTCTGTCTCACCAAGGTCA | 712-826 bp <sup>A</sup> |
| 6               | Fw: CACCAAGTGCCACAGGAAAG<br>Rv: GGCCAACAAGCGATCTTCAT | 704-833 bp <sup>A</sup> |
| 7               | Fw: TGGAGAGAGAAGGGATGGGT<br>Rv: TGGGCCATTGGTGTCTTGTA | 663-853 bp <sup>A</sup> |
| 8               | Fw: CTGAAGACTGGTGAGGGTGG<br>Rv: CACACGAGCATCATCCACTC | 330-409 bp <sup>A</sup> |

<sup>A</sup>Alternative splicing results in variable amplicon sizes

**Supplemental Table 9. List of qPCR primers used**

| Gene          | RefSeq/Source      | Primers                                               | Amplicon size |
|---------------|--------------------|-------------------------------------------------------|---------------|
| <i>PPIG</i>   | NM_004792          | Fw: TCTTGTCATGGCCAACAGAG<br>Rv: GCCCATCTAAATGAGGAGTTG | 84 bp         |
| <i>PDX1</i>   | NM_000209.3        | Fw: AAGTCTACCAAAGCTCACGCG<br>Rv: CGTAGGCGCCGCCTGC     | 52 bp         |
| <i>NKX2-2</i> | NM_002509.4        | Fw: GAACCCCTTCTACGACAGCA<br>Rv: ACCGTGCAGGGAGTACTGAA  | 82 bp         |
| <i>NKX6-1</i> | NM_006168          | Fw: TATTCGTTGGGGATGACAGAG<br>Rv: TGGCCATCTCGGCAGCGTG  | 91 bp         |
| <i>SOX9</i>   | NM_000346          | Fw: ATCAAGACGGAGCAGCTGAG<br>Rv: GGCTGTAGTGTGGGAGGTTG  | 100 bp        |
| <i>INS</i>    | NM_000207          | Fw: CAGAAGCGTGGCATTGTGGA<br>Rv: GCTGCGTCTAGTTGCAGTAG  | 82 bp         |
| <i>PCSK1</i>  | KiCqStart®         | Fw: 8810586217-10/0<br>Rv: 8810586217-10/1            | -             |
| <i>PCSK2</i>  | KiCqStart®         | Fw: 8810586217-20/0<br>Rv: 8810586217-20/1            | -             |
| <i>MADD</i>   | NM_00137665<br>1.1 | Fw: TCGAGGCGTACAAAGGGACAC<br>Rv: TACTGGGGAGCGCAGCAATC | 133 bp        |
| <i>NGN3</i>   | NM_020999          | Fw: GACGACGCGAAGCTCACCAA<br>Rv: TACAAGCTGTGGTCCGCTAT  | 98 bp         |
| <i>CPE</i>    | KiCqStart®         | Fw: 8810819465-30/0<br>Rv: 8810819465-30/1            | -             |
| <i>MAFA</i>   | NM_201589          | Fw: GCCAGGTGGAGCAGCTGAA                               | 77 bp         |

|               |                    |                                                              |        |
|---------------|--------------------|--------------------------------------------------------------|--------|
|               |                    | Rv: CTTCTCGTATTTCTCCTTGTAC                                   |        |
| <i>PreINS</i> | NG_007114.1        | Fw: GTGAACCAACACCTGTGCGG<br>Rv: AGGGGCAGCAATGGGCAGTT         | 139 bp |
| <i>Lhb</i>    | NM_008497.2        | Fw: CAGTCTGCATCACCTTCACCAC<br>Rv: CACACTGGCTGAGGCACAGG       | 100 bp |
| <i>Madd</i>   | NM_00117771<br>9.1 | Fw: GCTTATGGCGGAGAAATGGC<br>Rv: TCAGGCCAGGTTTGATGC           | 136 bp |
| <i>Tbp</i>    | NM_013684.3        | Fw: TAAGAGAGCCACGGACAACCTGC<br>Rv: AGTCTGGATTGTTCTTCACTCTTGG | 85 bp  |

**Supplemental Table 10. Antibodies used for flow cytometry (FC), immunocytochemistry (ICC), immunohistochemistry (IHC), and Immunoblotting (IB)**

| Antibody                                                        | Supplier                                                       | Use and dilution       |
|-----------------------------------------------------------------|----------------------------------------------------------------|------------------------|
| Mouse anti-CD184 (CXCR4) PE Conjugated                          | BD Biosciences Cat# 555974                                     | FC (1:10)              |
| Mouse IgG2a, kappa Isotype Control, PE Conjugated               | BD Biosciences Cat# 563023                                     | FC (1:10)              |
| Mouse anti-PDX1 PE Conjugated                                   | BD Biosciences Cat# 562161                                     | FC (1:80)              |
| Mouse anti-NKX6-1 Alexa Fluor 647 Conjugated                    | BD Biosciences Cat# 563338                                     | FC (1:80)              |
| Mouse anti-NKX6-1, PE Conjugated                                | BD Biosciences Cat# 555574                                     | FC (1:80)              |
| Rabbit anti-Insulin (C27C9) Antibody Alexa Fluor 647 Conjugated | Cell Signaling Technology Cat# 9008                            | FC (1:80)              |
| Mouse anti-C-Peptide Alexa Fluor 647 Conjugated                 | BD Biosciences Cat# 565831                                     | FC (1:80)              |
| Rabbit IgG Isotype Control Alexa Fluor 647 Conjugate            | Cell Signaling Technology Cat# 3452S                           | FC (1:80)              |
| Mouse IgG1, kappa Isotype Control, PE Conjugated                | BD Biosciences Cat# 555749                                     | FC (1:80)              |
| Guinea pig anti-INS                                             | Dako Cat# A0564                                                | IHC (1:500)            |
| Mouse anti-PROINS                                               | DSHB Cat# GS-9A8                                               | IHC (1:300)            |
| Mouse anti-GCG                                                  | Sigma-Aldrich Cat# G2654                                       | FC (1:80), IHC (1:500) |
| Alexa Fluor 488 Donkey anti-Mouse IgG secondary ab              | ThermoFisher Scientific Cat# A-21202                           | IHC (1:500)            |
| Alexa Fluor 594 Goat anti-Guinea Pig IgG secondary ab           | ThermoFisher Scientific Cat# A-11076                           | IHC (1:500)            |
| Alexa Fluor 488 Donkey anti-Mouse IgG secondary ab              | ThermoFisher Scientific Cat# A-21203                           | IHC (1:500)            |
| Rabbit anti-LH                                                  | National Hormone and Pituitary Program (NHPP) Cat# AFPC697071P | IHC (1:1000)           |
| Rabbit anti-FSH                                                 | NHPP Cat# AFPHFSHb                                             | IHC (1:1000)           |
| Rabbit anti-GH                                                  | NHPP Cat# AFP-5641801                                          | IHC (1:1000)           |

|                                                            |                                          |              |
|------------------------------------------------------------|------------------------------------------|--------------|
| Mouse anti-ACTH                                            | Fitzgerald Cat# 10C-CR1096M1             | IHC (1:1000) |
| Rabbit anti-TSH                                            | NHPP Cat# AFP-1274789                    | IHC (1:1000) |
| Rabbit anti-PRL                                            | NHPP Cat# AFP-4251091                    | IHC (1:1000) |
| Alexa Fluor 488 Goat anti-Rabbit IgG secondary ab          | Invitrogen Cat# A-11008                  | IHC (1:500)  |
| Alexa Fluor 488 Goat Anti-Mouse IgG secondary ab           | Abcam Cat# ab150113                      | IHC (1:500)  |
| Rabbit anti-GnRH                                           | Immunostar Cat# 20075                    | ICC (1:1000) |
| Mouse anti-Tuj1                                            | Sigma Cat# T8578                         | ICC (1:1000) |
| Alexa Fluor 488 Donkey anti-Rabbit IgG secondary ab        | Invitrogen Cat# A21206                   | ICC (1:500)  |
| Alexa Fluor 594 Donkey anti-Mouse IgG secondary ab         | Invitrogen Cat# A21203                   | ICC (1:500)  |
| Rabbit anti-MADD/<br>DENN clone EPR4919                    | Abcam Cat# ab134117                      | IB (1:1000)  |
| Mouse anti-RAB3(A-D)                                       | Synaptic Systems Cat# 107 011 Clone 42.1 | IB (1:1000)  |
| Mouse anti- $\beta$ -Actin                                 | Santa Cruz Cat# sc-47778                 | IB (1:1000)  |
| Rabbit anti- p44/42 MAPK ERK1/2                            | Cell Signaling Technology Cat# 9102      | IB (1:1000)  |
| Rabbit anti-phospho-p44/42 MAPK ERK1/2 (Thr202/<br>Tyr204) | Cell Signaling Technology Cat# 9101      | IB (1:1000)  |
| Goat anti-Rabbit IgG-HRP conjugate                         | Bio-Rad Cat# 1706515                     | IB (1:3000)  |
| Goat anti-Mouse IgG-HRP conjugate                          | Bio-Rad Cat# 1706516                     | IB (1:3000)  |
| Mouse anti-RAB3-GTP                                        | NewEast Biosciences Cat# 26920           | IP (1:1000)  |
| Rabbit anti-RAB3A                                          | NewEast Biosciences Cat# 21041           | IB (1:1000)  |

## Supplemental Methods

### Minigene assay

Strategy for generating inserts containing *MADD* exons 29, 30 and 31 and parts of the surrounding intronic sequences is presented below.

#### Genomic DNA sequence GRCh38:11:47311701-47323867

Intronic sequence included in the insert

Exons 29, 30 and 31

Intronic sequence excluded from the insert

AG/GT Acceptor site/Donor site

c.4377+2 T>G

```
CCTTGTTAAGAGTCATGTGTTGGCTTTTCAGGTAAATAAGAATGACATCCGCAAGAAGGTGAGGCGCCTAATGG
GAAAGTCGCACATTGGGCTTGTGTACAGCCAGCAAAATCAATGAGGTGCTTGATCAGCTGGCGAACCTGGTAAGC
ACGTCTGGCCACCCCTTAGGCTTCCCCATGGGTCATTTCTTGGTTTGTGTCACTTGCACTCCAGTTCACCCCGTT
TTTGAAAATGGAGCAGTTGTCTTTGACTGTAAATGAGGCATTAGTCCCTGTGTTCTGTGATGGGATTCTCTGTAT
AAAACCATCGTAGTGCATCAGTTTTGATGTGTGGTCTGTGAACTGCTGAGGGTTCAGAAGGTGAAAACGATTTCA
AATGATTCTAAAATGTTATTTGCTGTTTTACGGGGTTACATTTGCACTGATGGTACCAACGCAGTGATGGGTAA
AACTGCTGGCACTGTAACCCAAGTGAAGACAATGGCCCCAACTATGCCAGCAGCCATTGCATTCCCTTGCCCTTCA
TATACTCTCAGTTTTTCGTTTTTGTGTTTTGTTTTGTTTTTGTGAGACTGACTCTCACTCTGTCGCCCAGGCTGG
AGTGCAGTAGCGCAATCTTGGCTCACTGCAACCTCCACCTCCTGGGTTCAAGCGATTCTCATGCCCTCAGCCTCCC
AAGTAGCTGGGATTACAGGCATGTGCCCCGCCACCCAGCTAATTTTTGTATATACATATATATTTTTTGAGACAG
AGTTTCACTCTCTTGTGTCGCCAGACTGGAGTGCAATGGCGCAATTTTGGCTCACTGCAACCTCTGCCTCCCGAGT
TCAAGCAGTTTTTCCTGCTTCAGCCTCCCGAGTAGCTGAAGCTCCTGAGGTTACAGGCATGCACCACCACGCCCAG
CTAATTTTTGTATTTTCAGTAGAGATGGGCATTCCCCATGTTGGCCAGGCTGATCTTGAACCTCCTGACCTCAAGT
GATCTGCCTGCCTTAGCTCCCAAAGTTCTGGGATTACGGGTGTGAACCACCGCACCTGGCTTACACTCTTAGTTT
TTTAAAAATGCCAGTTGTGCTTGTAATGTCTTGAAGAAGCAGTGAAGACTGTTACTCTTATTAGATTGATTAA
TTATAAATGTTTTTAATATTCTTTGTGACAAAATGGGAAGTACACATAAAGCATCTCTGTTGCAAACCCAGTATG
ATGGTTGTTTTGAAGAAAAGCAATTTGCAGCCTTGATTTGTTACCTTGAGTTGCAAGTGAACCTAATCGCTTTG
TTCATTGAACATCATTTTTACTGGAAAGGACAATTAATAAACCATGGTTATTCAGAGTACCCAACCTGGCAGACAT
TTTCCTTCAGTTAATCAAGTGAGCCTGTTGTTTCAGGGAACCACTGACAGTATTTGTTGCCAATGATAAGATT
CAGCTTTTAAAGTAAAATAAGAATTTTGGCAGAGTTTGAACCTGAAGCTTCCCAATATTTAAAGACTTTTCTAA
TGAGATTGGTGGTGATATTAATGAATGTGATTTTTTAAACATTGATTAAATATTACAAAATATGTCAACATTTGG
AAGAGCTGTGTAACCTAGTGAAACACTATTTTCTTTCTTTTTTTTTTTTGGAGACGGAGTCTCGCTCTGTGGCC
CAGGCTGGAGTGCACTGGCAGGATGCTGGCTCACTGCTACCTCCGCCTCCTGGGCTCCTGGGTTCAAGCAATTCT
CCTGCCTCAGCCTCCTGAGCAGCTGGGAGTACAGGCGTATGCTGCCACACCTGGCTAGTTTTTTTTTTTTTTTGT
ATTTTAATAGAGACGGGTTTACCATCTTGCCAGGCTGTGGTCTTGAACCTCCTGAGTTTAGTCAATCCGCCCA
CCTTGGCCTTCCAAAGTTCTAGGATTACAGGCACCCAGCCAACAGTATTTTCTAAATACCAATGTATGATGTTGT
AAATTCAAGTATGGATAAAAGATCTACTCAAAATGCAAGGCAGAGATATGGATCTTAATTTTTAAATAACATTTT
TTTTCACTCTGGGGAACATAGACCCCATTTCTTTTGTGTTTGTGTTTTGTTTTGAGACGGAGTCTCACTCTGTC
ACCCGGGCTGGAGCAGCGGCGGATCTCGGCTCACTACAACCTCCGCCTCCAGGTTCAAGCTATTCTCTGTC
CTCAGCCTCATGAGTAGCTGGGATTACAGGTGCCCCGCCACAACGCCCGGCTAATTTTTATGTTTTTAGTAGAGAT
GGGGTTTACCACGCTGGTCAGGCTGGTCTCCAACCTCCTGACCTTTTGATCCGCCACCTCGGCCTCCCAAAGTG
CTGGGATTACAGGTGTGAGCCACCGCGCCCAGCCAAGGGAGACCCCATTTCTACAAAAAATAAAAAAATTAGCTA
GGCATGGTGGCATGCACCTGTAGTCCCAGCTACTTGGGAGGCTGAGGTGGGAGGATCACTTGAGCTCAGGAGGTT
GAGGCTGCCGTGAGCACCCTGCACTCCAGCCTGGGTGACAGAATGAGACCTGTCTCAAAAAAAAAAAAAAAGT
GTATGGAGAATAGGGTCTCACTTTGTTGCCAGGCTGGTCTCCAACCTCCTGCCTGGGCTCAAACGGTACTCCTGA
CTTGGCCTCCCAAAGTGTTGGGATTATAGGAATGAGCCACCATGTCTGGCCTAAATGGATTTTAATGTAACAATG
TAAAATGTTTCATTGATGTGCTTTCAGATTCCACACTGCAACTAACTTTCAAAGCTGCTTTTGCTGGGTGTTGTG
GTTTATGCCTGTAATTCAGGTACTTGGGAGGCTGAGGCAGGAGTGCTACTTAAGCCAGGAGTTCAGAGCTGTG
GTGGGCTATGGTCATGCCACTGCACTCCAGCCTGGATGACAGAGCGAAACCTTGTCTCTAAAAAAGAAAGCTT
CTGCTTCCCAAGTTCTGGTGTAGTGTAAAGAAGAATACGTCTATTTATCTGAAAAGGCTATGAAAATCCTCTTC
CATTTTCCAAATACGTATCTCTGAGGTCAAGTTTTTTTTTCATATACCTCAACCAAAGCAACATACTGCAACAGACT
CAATGCAGAGGCAGATAGGAGAATGCAACTATTTGATTCTAAGCCAAAACATTAAAGAGATTTGCAAAAATGTGAA
ACAGTGCCTTTTTTTTGAATAATAGTTATTTTATTAATAAATGTTTATATTACTATGTAATGGGTATATTAATC
```

ATTAATTGTTTTATAATTAATCATTGAGAAATTTCTGTTAAATTTCTAGTATGTAAATATCTATAAAATATAA  
 CTCACATAAAACAAAAGCTCTTTGGAATCTTCAATAAAATTTAAGAGATATAGGGCCTCTGAGACCAAAACATCTG  
 AAACCACTTCCCTGGTGACAGTGGCCAGCAGATGAGACTGTGCTGAGGAAGCCGATATGAATTTGATTGCTGGA  
 TGGGGAATTCTTGGCCAGAGCCCTCTGAGAGGGATGTATGACTGTCCCTAAAAAATCTCTCTTTTCATC**AGAAAT**  
**GGACGCGATCTCTATCTGGTCCAGTGGCAGCCGGCACATGAAGAAGCAGACATTTGTGGTACATGCAGGGACA**  
**GATACAAACGGAGATATCTTTTTTCATGGAGGT**AGGTGCTGGTTCATGCTGGGGGCCCAAAGGGCTATTGAGAGT  
 CACAGGGAACATAGGACCGATGCCAGGATATTTTCTCATTTATCTCATTCATCTTCATGATCTATTTATCAT  
 TAAATTATCAGATTGGTTTTTTTTGTTTTTTGCGTGTGTGTTTTTTTGAGATAGTGTCTCGCTCTGTCACCCAGGC  
 TGGAGTGTAGTGGCTTGATCTCGGCTCACTGCAACCTCCGCCCTCCCGGGTTCAAGCAGTTCTCCTGCCACAGCCT  
 CCAAAGTAGCTGGGATTACAGGCGCCAGCCACCAAGCCAGGTGATTTTTTCTATTTTAAATAGAGATGGGGTTTG  
 ATCATGTTGGCCAGGCTGGTCTCAAACCTCCTGACCTCAAGTAATCCACCCACCTTGGCCCTCCAAAATGCTGGTA  
 TTATAGGCATGAGCCACCGCACCCGGCCAAATATCAGATTGTTATTCAAATAATTAAATTTTATATAGTAGATG  
 ATACCCATTTCTTTTTTTTTTTTTTTTTTGGAGACAGAGTATCGCTCTGTCACCCAGGCTGGAGTGCAGTGGTGTGA  
 TCTTGGCTCACTGCAGCCTCCACCTCCAGGTTCAAGCAATTCTCCTGCCTCAGCTTCCTGAGTAGCTAGGATTA  
 CAGGCATGCGCCACCATGCCCCGGCCAATTTTTGTATTTTAGTAGAGGTGGGGTTTACCATGTTCTGTTGGCCAG  
 GCTGGTCTTGAACCTCCTGACCTCAAGTGATCCACCTGCCTCGACCTCCCAAAGTGTGGGATTACAGGTGTGAGC  
 CACTGCGCCCCGGCCCCATTTCTTTTATACACGTGCGCGCGCACACACACGCGCACACACATATACATAAAGATAT  
 CTATATATAGATGATATAGTCACATTGTTTCATAAAATCAGAATAACAGAAAAATAGTACACATTGGGAGGTCTTGCA  
 CTCATTCTTGTCCCCTTCCACTGAATTTCCCACTCCCCCTCACCCCTTCATCCTATAGACAACCACTTTTATTGGT  
 TTCCTTTGTAAATTCCAGTGGATTTTTTTTTTCTTTTTCTTTTTTTTTTTTTTTTTTTTGGAGACGGAGTCTCAC  
 TCTGTGCGCCAGGCTGGAGTGCAATGGCTTGATCTCAGCTCACTGCAACCTCCACCTCCTGGGTTCAGCGATTTC  
 TCCTGCCTCAGGCTCCCAAGTAGCTGGGATTACAGGCGCCACCACCGCACCCAGCTAATTTTTTGTATTTTTAG  
 TAGGGATGGGGTTTACCATGTTGGTCAGGCTGGTCTCCAACCTCCTGACCTCACTGATCCACCCGCCTCGGCCCTC  
 CCAAAGTGTGAGATCATAGGCTGAGCCGGTGACCCGGCCTTCCAGTGGACTTTTATGCAAAACAATAAAATAT  
 GAACACAAATTCTTATTTTCTCCTCTTTTTTCTTTTTCTTTTGAGACAGAGTGTGCTCTTTTGCTCAGGCTGGAGT  
 GCAGTGGTCCAAACTCAGCTCACTGCAACCTCTGCCCTTGGGTTCAGTGATTCTCCTGCCTCAGCTGCCTGAG  
 TAGCTGGGATTACAGTCGCCCCACCACCATGCCAGATAATTTTTTCTATTTTTTAGTAGAGACGGGGCTTACCATA  
 TTGGCCAGGCTGGTCTCAAACCTCCTGACCTCAAGTGATCTGCCACCTTAGCCTCACAAAGTGTGGGATTATAG  
 GCGTGAGCCACCCCGCCTGGCCTATTTTTCTCCTTTCTTTTCAGAAAAGATAGCACATCTTATCCATTGCTTTATCC  
 CTTGCTTTTTTTCATTTAACATTGTCTGGTCTCTTCTGTATCAGTACCAAGAAAGCTTTCCCATTGGTTTTATG  
 GCTACATGTATTCCACTGTGTGACTGTGCCTTAATTTATTTAACCAGTCAGTACATATGGATCCTTGGGTGCTT  
 CCAAATTTGCTGTTACTGATAGTCATACTGTGAATGATGCTGTGCCTGCTTCATTTTCATACATGTGCAAGTGTGT  
 CTAAGGATTCCCAGAAATGAGATTGCTGGGTGAGAGGACAATGCATTTGTAATTTTGGTTGATATAATTCTTAA  
 GTGTCTCATAACACGTAATACCCCTTTGCCATTAATTTTGTGGAAGAAATGGATCGTTTGCCCTGTGGAGTCT  
 CCTACATTCTAGATTTTTTGTGATTGTGTCTCCTTTGTATTAGCGTGTTCCTGTACATATTTCTCATAGACT  
 GGTAGTTCAGTTTAGAGGTTTGATCACTTTTCAGATTCACTCTTTTGGGAAGAATACTTAATGAGTGGTGTATAC  
 GCTTCTATTGCCTCATATGGTTGTCCCTCTCTTACACATCAGTGGGCTCAGATGTGGGCAACCTGATCTGCCCA  
 CCAGAAAGTTCCTCATTTGTCTCTGATTTTGCTATGGTATTTTTTGACACACATAAAATTTTTTATTGTATAT  
 AACTTTTTTTTTTTTTTGGAGACAGAGTCTCTCTATCGCCAGGCTGGATGCAGTGGCATGATCTCGGCTCACT  
 GCAACCTATACCTCCCGGGTTCAAGCAGTCTCTCTGCCTCAGCCTCCCAAGTAGCTGGGTTTACAGGTGCCTGCC  
 ACCACACCCGGCTAATTTTTGTGTTTTTAGTAGAGATGGGGTTTACCATGTTGGCCAGGGTGGTCTCGCACTCC  
 TGACCTCAAGTGATCCACCCACCTCGGCCCTCCCAAGTCTGGGATTACAGGTGTGAGCCATCAGCCTGGCTAC  
 TTTTATATAAATTAATAATCAATAGTTTTCTTTTACGGCTCTGGATTTTGAGGCATGGTTAGAAAAAGCCTTAC  
 TCTCCAGGATTATAAAGGAAATTGCCGTGTTTTCTTCATTTCTGTGTTTTTAATTCTGAAACAGACCTAAGTAA  
 TTTTAAGGACCAATAACAACCTTATATATAAAGTAGTAAAAATTTTGCCTATGTTATCTGTTCCCCTGTGGTTTA  
 GCTGAATTTGAATATCACATTACAGTTTTTTTGAACAGGTGGTCTACCAACGCAAGAAGGGCTTACCCTGAAG  
 CAGAAACATACATGTCACTGTAGCCAAGAAGGAGTCATTTTCATGTCACCTTTAAAGTGTAGAAATTTGGCTAG  
 TTGCCTCTCAGAGCCTAGGGCTGACTTAGGACATCTGCACCACAGCAGAAGTGGCACATGACTCTTGGCCTTTTC  
 TTTTCTTTTTAAAAAAAATATCTCCAGCAGATTCTTGAACCTACTCTTACTCTCACCACCGTACAAAGGGAGCCT  
 CATGCTAAGTCTCTGGAGTGTGGGACTGGACCCATTACCCAAATAGATGCCTCTTCTCAGAGTGGTGCCATGCC  
 AGGGAAGAGTGCACCATGGTCACTGTGCCATCACCTGGCTCCTGTGAGGCTATTTGATTTAGCCTTTCTCAGAGC  
 ATAGCCTGCTTTTTGTCATGATCAACTGGACAGCAGTTTGGGAATTTTTTTTTTTTTTTTTTTTTTTTTTTTTT  
 TTTTGAGACAGAGTCTCACTCTGTTGCCAGGCTGAAGTGCAGTGGTACAATCTTGGTTCATGCAACCTCCACT  
 TCCCAGGTTCAAGCGATTCTCCTGCCTCAGCCTCCTGAGTAGCTGGGACTACAGGCACATGCCATCATGTCTGGC  
 TAATTTTTTGTATTTGTAGTAGAGACGGGGTTTACCATTTTGCCAAGCTGGTCTCGAACTCCTGACCTCAAGTG  
 ATCTGCCACCTCAGCCTCCCAAAGTGTGGGATTACAGGTGTGAGCTGCCACACCTGGCCAAGGAAAATATATA  
 TATATATATAATTTTTTTTTTTTTTTTTTGGAGGTGGAGTCTTGCTCTGTCAACCAGGCTGGAGTGCAGTGGCACA  
 TCTTGGCTCACTGCAACATCCACCCACCGACTTCAAGAGATTCTCTACCTCAGACTCCCGAGTAGCTGGGACTA  
 CAGGCACGCATCACACGCTTGGCTAATTTTTTGGTATTTTGTAGCAGAGATGGGGTTTGGCATGTTGGCCAGGAT  
 GGTCTTGAACCTCCTGACCTTAAGTGATCCGTCTGCCTTGGCCTCCCAAATGCTAGGATTACAGGTGTGAGCCAC

CATACCCAGCCAAAGATTTTTAAAAATTGTCTTTGTTGCCCTTTTTTTAGTTACAGAAGTAAAACAGTATATGCT  
 GTAAATGTTTTCAAACCGTGCCAAAGTTAAAAAATAATTAAGGTTTTACTCACTGCCTTTCAATCCTTTGTCCCA  
 GAGGTAACCAGTAATGAAGAGTTTTATGTGACTCCTTTCAGATTATTGAAAATGCATATTTGTGCAAATATAATT  
 TATTTATATGGAATTTTGTGTTTGCACCTTACGAAAAGTGGTATCAAAATTACAAATATTGGGCTGGGCATGGTGGCT  
 CACATGAGCCTGTAATCCCAGCACATTGGGAGGCCGAGGCAGGTGGATAAAGTTGAGGTGAGGAGTTCCAGACAAG  
 CCTAGCCAACGTGGTGACACCTGTTTCTACTAAAAATACAAAAATTAGCCGGGCGTGTTGGGCAGGCGCCTGCA  
 ATCCCAGCTACATGGGAGGCTGAGGCAGGAGAATCGCTTGAACCCGGAGGCGGAGGTTGCAGTGAGCCGAGATCA  
 TGCCACTGCTCTCCAGCCTGGGTGACAAAGCGAGACTCCATCGCAAAAAAAAAAAAAAAAAAAAAATTACAAATA  
 TTGTTAAATAATTTGCTTTTTTCACTTAATGATATACCTTCCGTGTCTTTTTTTTTTTTTCTTTAATGGATGCT  
 TAGCCATTAGATGTCGTATGGTGTACCATAAATGGTTTAACTAGTGCCTCTCACTATTTTTTAAAAAATATTAC  
 TCATGCTGGGTGTGGTGGCTCACGCCTGTAATCCCAGCACTTTGGGAGGCCAAGGTGGGTGGATCACGAGGTCAA  
 GAGTTCAAGATCAGCCTGGCCAAGATGGTGAAACCCCTGCCTCTACTAAAAATACAAAAAATTAGCCAGGCGAGGT  
 GGTGGGTGCTTGTAATCCCAGTTACTTGGGAGGCTGAGGCAGAGAATTGTTTGAACCTGGGAGGCGGAGGTTGCA  
 GTGAGCCGAGATTGCACCACTTCACTCCAGCCTGGGCGACAGAGCAAGACTCCGTCTCAAAAAAAAAAATTTAAAA  
 AAATGAAATATATATTTATATATTACTCATTAGGCCAAGCATGTTGGCTCACGCCTGTAATCCCAGTACTTTGGG  
 AGGCTGAGGCAGGAGGATTGCTTGAGCCAGAGTTTGAGACCAGCCTGGGCAACATAGGGAGACCCGTCTCTCTAT  
 AAAAAATTTAAAAATTAGTCATACATGTGGTGATGTATGCCTGTGGTACCAGCTACTGGGGAGGCTGAGGTGGGA  
 GGTTCGCTTGAGCCAGGAGGTCAAACCAGCCTGGGCAACATAGGGAAACCCCGTCTCCACAAAAAATTTTAAA  
 ATAAGCTAGGCATGCTAGTGCATGCCTATGGTCCAGTACTGGGGAGGCTAAGTTGGGAGGATCCTTGAGCCTG  
 GGAGGTCAAGGCTTCAGTGAGCTCTGATTACCACTTCAGTCCATCCTGGGTGACAGAGCAAAACCCGTCTCTCA  
 AAAAAATAATAATAATAATAATAATTGCTCATTGAATATCCTTGAACATATATTTTTGCACCCTCACATGAGAATT  
 TCTATAGGATATAGTCTAGACATGAAAATTTCAAGTCAAGCTTATATACGTTTAAAAATTTTCGGTAGATTTTGCC  
 AAATTGCCATCCCAAAACTATACCAGTTTACACCTCCAACAGCCACTTAGACGACTATAACAGTATATTACAAG  
 CATTTCTCTAGACTAGAATGCTCTAGCTTAGAAATCATGTGTTCTCCTAAATGTGTTCTGCCCTGCCCTTTACATGA  
 TGTTCTTAAAGGATTATGAAAGGTGGAGTGGTATTGTCCATTTTCCCCCTGGAGATAACCACAGAGTCAGACTGG  
 GCCTAGAACTCAAGTTTCCCATTCCTACTCTGCCACTTTGACTGATTCTTCAAAGGCTTTAGAACTCCAGTAAAG  
 TCTTATACAGTAGCTTAAACCTGATAGTCTTGTGTGTTCTTACTCACTCACCTAATATTTGTGGAGCACGTATT  
 ATATGCTAGGTACTTTGTTGGGTGTTGGGATTATAGCAGTGAATAAGACAGACGTGATTTCTATTGCCCTTAGCA  
 TTGACAAGCTATTGGGGAATCAGATAATTAAGAGTATTATAAAATATGGTGAGCATTATGAAAGAGCTCAGG  
 GGGGGCAGAATAAATACCAGAGGGCCTAGGAGCTGTGGACAACCTCTTGGAGAGTTGACCTTTGAGCTTAGACT  
 TGAAGAAAGAGTAAGAGTTAATGGTTGGGGAGTGGAAGAGCAGTCAGGGATATTTGAGCTAGAACCAATGGGACT  
 CAGTGATGGAGTGATGTTAGTTAGAGGGAAGAGGAAGGAGTCGGGCATCAATTCTTCAATTCAGGCTGGGGCAGC  
 TGGGTGGATGGTGGTGCCATTTCTCAAATAGCAGACTTAAAGGAGGATCTGCCCAGGAGGAGATGTTGAGTTC  
 AGATTTGGACACAATGAGTTTGGGTGCTACATGTGAAGCATCCAGACACTGAGAAGCTCAGGAGCTCAGGAAGA  
 GAGGTCTAAGATGGAGAAAGGTAAGAACCATCAACATGGTAATAATCATTAGTATCATAGTTCTGATATCTAGTA  
 GCTAATTAGGGTACTTTCTGTGTGCCTGGCTTTGTGTGCACCTTAAATACTTTATGCACATTAACCTATTTAGTC  
 TTCATAGTAACCTGTAGGAAGTTATTACTGTTACTATCCCCATCTTACCTGTGAGGAATTGTGGACACAGATGAAC  
 TTGCTCAGGGTGGCACAGCTCAGTAATGGCAGAGCTGGAATCTAAACTCAGGCTGACTTTAGACCTGTGCCCTTC  
 ACCATTGTGCTGTAATGTCTCCCGTAACATTTGAAGCCTTAAGAACGGATAACTGGCTGCGCATGGTGGCTCACG  
 TCTGTAATCCCAGCACTTTGGGAGGCCGAGGCGGGCGGATCATGAAGTCAGGAGATCAAGACTATCCTTGCTAAC  
 ACGGTGAAACCCCGTCTCTACTTAAAAAATATATAAAAAAATTAGCCGGGCGATGGTGGTGGGTGCCCTGTAGTCCC  
 AGCTACTCGAGAGGCTGAGGCAGGAGAATGGCGTGAACCTGGGAGGCGGAGCTTGACAGTGAGACGGGATTGCGCC  
 ACTGCACTCCAGCCTGGGCGACAGAGCGAGATCCGTCTCAAAAAGAAGAACAGATAACTTCACCTGAAAGAGAAT  
 GTTGAACAAGAAGGTGTCAAAGATATTTGCTTTTTAATTTATATCATCCTGTATTGTATCATTTTTTATGTAATAA  
 GCATTGTTTCATGTGTCACTTGTGTAATTAATTTTTAAAAATATTTTTATAGAAAAAGGTTAGACCAGGATTAGA  
 AAGTGCATCAGCTCCATTTTCTCCTTGTTAAGTCTGTGATGATCTCCTACCTTTGTGTTTGTCAACAAAGATG  
 ATTCTGAGCTTGTAAGATGGAGGCATGAGATCTCCTCCAAATACTTTAAGTCCGTAGAGCACATAAGAGGTAAT  
 AAATAACTGGGCCGGGCGCGGTGGCTCACGCCTGTAATCCCAGCACTTTGGGAGGCCAAGACGGGTGTATCACTT  
 GAGGTGAGGAGTTTCGAGAGCAGCCTGGCCAACATGGTGAAACCCGTCTCTACTAAAAATACAAAAATTAGCTGA  
 GCATGGTGATGTGTGCCTGTAATCTCAGCTACTCGGGAGGCTGAGGCAGGAGAATCATTTTAAACCCACAAGGCAG  
 AGGTTGCAGTGAGTCGAGATTGCACCACTGCACCTCCAGCCTGGGCAACAGAGTGGGACTCCATCTCAAAAAAAA  
 AAAAAAATTTATAGCCAATGTGATGGTGTGCACCTGTAGTCCCTGCTACTTTGGGGGCTGAGGCAGGAAGAACC  
 TGGCTGGTTCGAGGCTGCAGTGAGCTGAGATGGCGCCACTGCAGTCAAGCCTGGGGTACAAAGTGAGACCCTGTCT  
 CAAAAAAGAGGTAATAAATAACTGATTGATTTGTGCCTCCTCCCTTATACATCGGTTCCCTTCTAATG  
 ACTCCATCTCTTCCAACAATCCTTGATAGCAGGCAGCATGTCAGTAGTTCTGTTTTGTGTCTTCACCTAGGGAAAC  
 CATGAGCGTAAGGCAGAAAACCTGACCATGGGGATGCCCCAGGACCCTTTCCCTGTAGGAAACAGTCTAGGGA  
 GAGGCTGTGAGACAGGAACCACTGAGCCGCTTTGTGCACTTCTCCAGGTGTGCGATGACTGTGTGGTGTTCG  
 GTAGTAACATCGGAACAGTGTATGAGCGCTGGTGGTACGAGAAGCTCATCAACATGACCTACTGTCCCAAGACGA  
 AAGTGTGTGCTTGTGGCGTAGAAATGGCTCTGAGACCCAGCTCAACAAGTTCTATACTAAAAAGGTACGCAGG  
 ATCTGTGTTTGGGTTGGGGCTAG

## Final T-construct (wild type) insert sequence:

CCTTGTTAAGAGTCATGTGTTGGCTTTTC**AG**GTAATAAGAATGACATCCGCAAGAAGGTGAGGCGCCTAATGG  
GAAAGTCGCACATTGGGCTTGTGTACAGCCAGCAAATCAATGAGGTGCTTGATCAGCTGGCGAACCTG**GT**AAGC  
ACGTCTGGCCACCCCTTAGGCTTCCCCATGGGTCATTTCTTGGTTTGTGTCACTTGCAGTCCAGTTACCCCGTT  
TTTGAAAATGGAGCAGTTGTCTTTGACTGTAAATGAGGCATTAGTCCCTGTGTTCTGTGATGGGATTCTCTGTAT  
AAAACCATCGTAGTGCATCAGTTTTGATGTGTGGTCTGTGAACTGCTGAGGGTTCAGAAGGTGAAAACGATTTCA  
AATGATTCTAAAATGTTATTTGCTGTTTTACGGGGTTACATTTGCACTGATGGTACCAACGCAGTGATGGGTAA  
AACTGCTGGCACTGTAACCCAAGTGAAGACAATGGCCCCAACTATGCCAGCAGCCATTGCATTCCCTGTCCTCA  
TATACTCTCAGTTTTTCGTTTTTGTGTTTTGTGTTTTTGTGTTTTTGTGAGACTGACTCTCACTCTGTGCGCCAGGCTGG  
AGTGAGTAGCGCAATCTTGGCTCACTGCAACCTCCACCTCCTGGGTTCAAGCGATTCTCATGCCCTCAGCCTCCC  
AAGTAGCTGGGATTACAGGCATGTGCCCCGCCACCCAGCTAATTTTTGTATATACATATATATATTTTTTGAGACAG  
AGTTTCACTCTCTTGTGCCCAGACTGGAGTGCAATGGCGCAATTTTTGGCTCACTGCAACCTCTGCCTCCCGAGT  
TCAAGCAGTTTTCTGCTGGATGACAGAGCGAAACCTTGTCTCTAAAAAAGAGCTTCTGCTTCCCAAGTTC  
TGGTGTAGTGTTAAAGAAGAATACGTCTATTTATCTGAAAAGGCTATGAAAATCCTCTCCATTTTCCAAATACG  
TATCTCTGAGGTCAAGTTTTTTTTCATATACCTCAACCAAGCAACATACTGCAACAGACTCAATGCAGAGGCAGA  
TAGGAGAATGCAACTATTTGATTCTAAGCCAAACATTAAAGAGATTTGCAAAAATGTGAAACAGTGCCTTTTTTTT  
TGAAAATATAGTTATTTTATTAAAAATGTTTATATTACTATGTAATGGGTTATATTAATCATTAATTGTTTTTTAT  
AATTAATCATTTGAGAAATTTCTGTTTAAATTTCTAGTATGTAAATATCTATAAATAAAGTACATAAAACAAA  
GCTCTTTGGAATCTTCAATAAATTTTAAGAGATATAGGGCTCTGAGACCAAAACATCTGAAACCACTTCCCTGG  
TGACCAGTGGCCAGCAGATGAGACTGTGCTGAGGAAGCCGATATGAATTTGATTGCTGGATGGGAATTTCTTGGC  
CCAGAGCCCTCTGAGAGGGATGTATGACTGTCCCTAAAAAATCTCTCTTTTCATC**AG**AATGGACGCGATCTCTCT  
ATCTGGTCCAGTGGCAGCCGGCACATGAAGAAGCAGACATTTGTGGTACATGCAGGGACAGATACAAACGGAGAT  
ATCTTTTTTCATGGAG**GT**AGGTGCTGGTTCATGCTGGGGGCCCAAAGGGCTATTGAGAGTCACAGGGAACTCATA  
GGACCGATGCCAGGATATTTTTCTCATTTATCTCATTCATCTTCATGATCTATTTATCATTAATTTATCAGATTG  
GTTTTTTTTGTTTTTTCGCTGTGTGTTTTTTTTGAGATAGTGTCTCGCTCTGTCAACCCAGGCTGGAGTGTAGTGGCT  
TGATCTCGGCTCACTGCAACCTCCGCCTCCCGGGTCAAGCAGTTCTCCTGCCACAGCCTCCCAAGTAGCTGGGA  
TTACAGGCGCCAGCCACCAAGCCAGGTGATTTTTCTATTTTTTAATAGAGATGGGGTTTGATCATGTTGGCCAGG  
CTGGTCTCAAACCTCCTGACCTCAAGTAATCCACCCACCTTGGCCTTCCAAAATGCTGGTATTATAGGCATGAGCC  
ACCGCACCCGGCCAAATTATCAGATTGTTATTCAAATAATTAAATTTTATATAGTAGATGATACCCATTTCTTTT  
TTTTTTTTTTTTTGGAGACAGAGTATCGCTCTGTCAACCCAGGCTGGAGTGCAGTGGTGTGATCTTGGCTCACTGCA  
GCCTCCACCTCCAGGTTCAAGCAATTCCTGCTCAGCTTCTGAGTAGCTAGGTTGAGACAGCCTGGCCA  
ACATGGTGAAACCTGTCTCTACTAAAAATACAAAATAGCTGAGCATGGTGTATGTGTGCCTGTAATCTCAGCT  
ACTCGGGAGGCTGAGGCAGGAGAATCATTTTTAACCACAAAGGCAGAGGTTGCAGTGAGTCGAGATTGCACCACTG  
CACTCCAGCCTGGGCAACAGAGTGGGACTCCATCTCAAAAAAAAAAAAAAAAAAATTATAGCCAATGTGATGGTGT  
GCACCTGTAGTCCCTGCTACTTTGGGGGCTGAGGCAGGAAGAACCTGGCTGGTTCGAGGCTGCAGTGAGCTGAGAT  
GGCGCCACTGCAGTCAAGCCTGGGGTACAAAGTGAGACCCTGTCTCAAAAAAAAAAAAAAAAAAGAGGTAATAAATAAC  
TGATTGATTTGTGCCTCCTCCCTTATACATCGGTTCTTCTAATGACTCCATCTCTTCCAACAATCCTTGTAGCA  
GGCAGCATGTGAGTAGTTCTGTTTTGTGTCTTCACTAGGGAAACCATGAGCGTAAGGCAGAAAACCTGACCATG  
GGGATGCCCCAGGACCCTTTCCCTGTAGGAAACAGTCTAGGGAGAGGCTGTCAGAGACAGGAACCACTGAGCC  
GCTTTGTGCACTTCTCC**AG**GTGTGCGATGACTGTGTGGTGTGCGTAGTAACATCGGAACAGTGTATGAGCGCT  
GGTGGTACGAGAAGCTCATCAACATGACCTACTGTCCCAAGACGAAGGTGTTGTGCTTGTGGCGTAGAAATGGCT  
CTGAGACCCAGCTCAACAAGTTCTATACTAAAAAG**GT**ACGCAGGATCTGTGTTGGGTTGGGGCTAG

## Final T>G-construct insert sequence:

CCTTGTTAAGAGTCATGTGTTGGCTTTTC**AG**GTAATAAGAATGACATCCGCAAGAAGGTGAGGCGCCTAATGG  
GAAAGTCGCACATTGGGCTTGTGTACAGCCAGCAAATCAATGAGGTGCTTGATCAGCTGGCGAACCTG**GT**AAGC  
ACGTCTGGCCACCCCTTAGGCTTCCCCATGGGTCATTTCTTGGTTTGTGTCACTTGCAGTCCAGTTACCCCGTT  
TTTGAAAATGGAGCAGTTGTCTTTGACTGTAAATGAGGCATTAGTCCCTGTGTTCTGTGATGGGATTCTCTGTAT  
AAAACCATCGTAGTGCATCAGTTTTGATGTGTGGTCTGTGAACTGCTGAGGGTTCAGAAGGTGAAAACGATTTCA  
AATGATTCTAAAATGTTATTTGCTGTTTTACGGGGTTACATTTGCACTGATGGTACCAACGCAGTGATGGGTAA  
AACTGCTGGCACTGTAACCCAAGTGAAGACAATGGCCCCAACTATGCCAGCAGCCATTGCATTCCCTGTCCTTCA



### 1. PCR to generate and amplify gRNA guides for generating *dex30* HEK293 cells

- gRNA, where n's represent the specific guide sequence:  
5'-GTGGAAAGGACGAAACACCgnnnnnnnnnnnnnnnnnnnnnGTTT TAGAGCTAGAAATA  
G -3'
- U6 promoter:  
5'-GTAAAACGACGGCCAGTgagggcctatttcccatgattccttcatttgcatatacgatacaaggctgttagagaga  
taattggaattaatttgactgtaaacacaaagatattagtacaaaatacgtgacgtagaaagtaataatttctgggtagttgcagttttaa  
attatgttttaaatggactatcatatgcttacgtaactgaaagtatttcgatttctggctttatatatcttGTGGAAAGGACGA  
AACACC-3'
- Terminator:  
5'-  
GTTTTAGAGCTAGAAATAGcaagttaaaataaggctagtcggttatcaacttgaaaaagtggcaccgagtcggtgcT  
TTTTTTCATGGTCATAGCTGTTTCCT
- Primer Fw: actgaattcgatcctcgagcgtctcacccGTAAAACGACGGCCAGT
- Primer Rv: catgccggccgctcgacagatctcgttcacatgAGGAAACAGCTATGACCATG

5 ng of U6 promoter and U6 terminator were concatenated with 2  $\mu$ M of gRNA template in a PCR reaction with Phusion polymerase (Thermo Fisher Scientific) in the presence of 1x High Fidelity buffer, 50 pmol of forward and reverse primers and 200  $\mu$ M dNTP in a volume of 100  $\mu$ l. The PCR cycling conditions were as follows: 35 cycles of 98°C for 10 s, 52°C for 30 s and 72°C for 12 s. The PCR amplified guides were subjected to agarose gel electrophoresis and purified from the gel using NucleoSpin Gel and PCR Clean-up, Mini kit (Macherey-Nagel).

The pEGFP-C1A-RAB3A construct (4) was a kind gift from Dr. Johan Peränen, Institute of Biotechnology, University of Helsinki, Helsinki, Finland.

## Supplemental References

1. Schneeberger PE, Kortum F, Korenke GC, Alawi M, Santer R, Woidy M, et al. Biallelic MADD variants cause a phenotypic spectrum ranging from developmental delay to a multisystem disorder. *Brain*. 2020;143(8):2437-53.
2. Barsby T, Ibrahim H, Lithovius V, Montaser H, Balboa D, Vähäkangas E, et al. Differentiating functional human islet-like aggregates from pluripotent stem cells. *STAR Protoc*. 2022;3(4):101711.
3. Balboa D, Weltner J, Eurola S, Trokovic R, Wartiovaara K, and Otonkoski T. Conditionally Stabilized dCas9 Activator for Controlling Gene Expression in Human Cell Reprogramming and Differentiation. *Stem Cell Reports*. 2015;5(3):448-59.
4. Lonka-Nevalaita L, Lume M, Leppanen S, Jokitalo E, Peranen J, and Saarma M. Characterization of the intracellular localization, processing, and secretion of two glial cell line-derived neurotrophic factor splice isoforms. *J Neurosci*. 2010;30(34):11403-13.
